# Supplementary material
Source: PubMed Central journal article supplement (PMC4902486)
Supplement: medi-95-e3437-s001.pdf [file medi-95-e3437-s001.pdf]

## **SDC 1. Supplementary notes to Methods**

### *Settings*

Groote Schuur Hospital is a 975-bed urban academic hospital situated in Cape Town, in the Western Cape province, which provides secondary and tertiary level care, serves as a referral centre for approximately half of the province's population (2011 population: 5.8 million)<sup>1</sup> and is associated with the University of Cape Town. At this hospital we surveyed the general medical wards during May and June 2013. We did not survey the sub-speciality wards (dermatology, neurology, cardiology, respiratory medicine and nephrology), the oncology wards, or the high care / intensive care units. Restricting the survey to general medical wards was done partly due to resource limitations but also to allow the patients at this site to be reasonably comparable to those at other sites, which did not have sub-specialist wards. In 2009, the crude inpatient mortality in the medical wards of Groote Schuur Hospital was shown to be 573/3465 patients (17%)<sup>2</sup> and the 12-month post-discharge mortality to be 145/415 (35%).<sup>3</sup>

Edendale Hospital is a 900-bed peri-urban regional teaching hospital situated near Pietermaritzburg, in the KwaZulu-Natal province (2011 population: 10.3 million).<sup>1</sup> It provides care to the peri-urban community and serves as a referral centre for several district hospitals in the surrounding rural area. It is located at the epicentre of the HIV, tuberculosis and multidrug resistant tuberculosis epidemics in South Africa: a post-mortem study in 2008-2009 found that 94% of decedents in the medical wards of Edendale Hospital were HIV-seropositive, 50% had culture-positive tuberculosis at the time of death and 17% of these cultures were resistant to isoniazid and rifampicin.<sup>4</sup> At Edendale Hospital, we surveyed the medical wards over 30 days during July and August of 2013. We did not survey the intensive care unit, and there were no high care unit or sub-speciality wards at the time of this survey.

Cecilia Makiwane Hospital, situated in the large peri-urban community of Mdantsane in the Eastern Cape province, and Frere Hospital, situated in the city of East London, are co-managed as the East London Hospital Complex and provide secondary and tertiary-level care. These hospitals also serve as referral centres for a significant part of the province (2011 population: 6.6 million).<sup>1</sup> At these two teaching hospitals, we surveyed the general medical wards, as well as the high care and intensive care units, over 30 days during August and September 2013; there were no sub-speciality wards at the time of this survey. The burden of disease in the medical wards of these hospitals has not previously been published.

All four hospitals are public sector facilities. In the overburdened public health sector of South Africa, even at tertiary centres, elective medical admissions are rare and virtually all admissions to the medical wards occurred as emergencies via the emergency department or via primary care facilities.

### *Identification of new admissions*

We identified all newly admitted patients using hospital administrative records. When possible, we cross-referenced administrative records with lists of admissions kept by the medical team on intake. We included in our survey all patients whom the medical team decided to admit, regardless of their actual admission status; thus, we included those patients who were discharged from or died in the emergency unit while still awaiting transfer to a ward. We collected data on weekdays; thus we identified newly admitted patients and collected the initial dataset within three days from the date of admission.

### *Multidisciplinary case review panels*

We constituted two case review panels to review the causality, severity and preventability of cases identified as potential adverse drug reactions (ADRs). The first panel, consisting of a clinical pharmacist, a clinical pharmacologist, and one to three physicians / internists, reviewed the cases of patients who died during the 30-day survey period. (For these patients,

we had more detailed information in the form of a copy of their hospital folder, as well as a narrative case summary, prepared by the first author.) This panel's primary aim was to identify deaths in which ADRs played a causal or contributory role; results have been previously published.<sup>5</sup> For the purposes of our previous paper, the panel assessed the deaths of 105 patients: 28 of those were not included in the denominator of the current survey, as they were admitted prior to the current paper's 30-day survey period, and a further 48 patients' deaths were unrelated to ADRs, or related to ADRs that were not present on admission but developed in-hospital, or related to ADRs that were present on admission but did not form the main reason for admission. Those 48 cases are thus not included in the current study's numerator, but do form part of the current study's denominator. The remaining 29 patient folders which were assessed by the first case review panel fulfilled the inclusion criteria of the previous<sup>5</sup> and the current survey (i.e., were admitted due to an ADR and died during the 30-day survey period), and have thus been included in both studies' analyses.

The second panel, who assessed the suspected ADR-related admissions of patients alive at the end of the 30-day period, consisted of a research pharmacist, a clinical pharmacist, a general practitioner (GP), a second GP / medical epidemiologist, two clinical pharmacologists, and a physician. This panel performed their assessments in two rounds. In the first round, two GP-pharmacist pairs reviewed all 196 suspected ADR-related admissions, with the pairs reviewing the case independently from one another. Cases in which the two pairs disagreed on the WHO-UMC causality rating of any drug-event association were forwarded to the second round; cases where the two pairs agreed on the WHO-UMC causality rating of all drug-event associations were not forwarded to the second round. (In cases not forwarded to the second round, disagreements regarding preventability or severity were resolved through discussion by the panel members.) All seven panel members participated in the second round of assessment, during which the causality, preventability and severity of 132 cases were discussed until consensus was reached.

Three authors reconciled the data generated by the two assessment panels, as some methodological differences existed between their assessments: in the event of one ADR being attributed to multiple drug causes, the first panel (who assessed cases of patients who died) performed their causality assessment on each drug suspect individually. For the purposes of the current paper, however, we distinguish between Type A and Type B ADRs in our approach to causality assessment of these cases with multiple drug suspects, as described in the manuscript.

#### *Presumptions and exceptions on Anatomic-Therapeutic-Chemical (ATC) coding*

We presumed all aspirin to have been used for inhibition of platelet aggregation (and not for analgesia), and thus coded it to the ATC code B01AC06.

We presumed all bronchodilators and corticosteroids to have been inhaled, unless specifically documented to have been used systemically.

We coded antiretroviral and antituberculosis fixed drug combinations to the two, three, or four component drugs. We did not code other combinations to their components, but instead arbitrarily increased a patient's drug count with one unit for every combination drug recorded.

In the event that the precise drug was not known, but the class was, we coded the drug to the lowest level possible. For example, unspecified antihypertensive therapy was coded as C ('Cardiovascular system'). All insulins were recorded and reported as A10A ('Insulin and analogues'). Where the fourth-level drug code (class) exploded down to only one fifth-level code (drug), we reported the drug name. (For example, the fourth-level (class) code C03CA 'high-ceiling diuretics: sulfonamides, plain' had only one member, the fifth-level (drug) code C03CA01 'furosemide'. For the purpose of this paper, we reported it as 'C03CA furosemide'.)

### Reporting of ADRs

MedDRA® is a multiaxial classification system, with lower-level terms not mapping on a one-to-one basis to higher-level terms. For reporting purposes, we grouped MedDRA® ‘preferred terms’ as follows:

| Reported ADR                     | MedDRA® ‘preferred terms’ included in the reported ADR                                                                                                                                                                                                                                                  |
|----------------------------------|---------------------------------------------------------------------------------------------------------------------------------------------------------------------------------------------------------------------------------------------------------------------------------------------------------|
| Blood dyscrasias                 | Anaemia, Anaemia macrocytic, Anaemia normochromic normocytic, Aplastic anaemia, Pancytopenia, Thrombocytopenia, Leukopenia, Neutropenia                                                                                                                                                                 |
| Drug-induced liver injury (DILI) | Cholestatic liver injury, Hepatocellular liver injury, Mixed liver injury, Hepatorenal failure <sup>a</sup>                                                                                                                                                                                             |
| Renal impairment                 | Renal failure acute, Renal failure, Hepatorenal failure <sup>a</sup>                                                                                                                                                                                                                                    |
| Haemorrhage                      | Gingival bleeding, Gastric haemorrhage, Gastrointestinal haemorrhage, Gastritis haemorrhagic, Lower gastrointestinal haemorrhage, Haemoptysis, Epistaxis, Haemarthrosis, Haematuria, Retroperitoneal haemorrhage, Menorrhagia, Cerebral haemorrhage, Haemorrhage intracranial, Subarachnoid haemorrhage |

(a) Hepatorenal failure was reported under two grouped terms.

### References

1. Statistics South Africa. *Census 2011. Statistical release P0301.4 (Revised)*. Pretoria: Statistics South Africa; 2012.
2. Myer L, Smith E, Mayosi BM. Medical inpatient mortality at Groote Schuur Hospital, Cape Town, South Africa, 2002-2009. *S Afr Med J*. 2013;103(1):28–31.
3. Stuart-Clark H, Vorajee N, Zuma S, et al. Twelve-month outcomes of patients admitted to the acute general medical service at Groote Schuur Hospital. *S Afr Med J*. 2012;102(6):549–53.
4. Cohen T, Murray M, Wallengren K, Alvarez GG, Samuel EY, Wilson D. The prevalence and drug sensitivity of tuberculosis among patients dying in hospital in KwaZulu-Natal, South Africa: a postmortem study. *PLoS Med*. 2010;7(6):e1000296.
5. Mouton JP, Mehta U, Parrish AG, et al. Mortality from adverse drug reactions in adult medical inpatients at four hospitals in South Africa: a cross-sectional survey. *Br J Clin Pharmacol*. 2015;80(4):818–826.

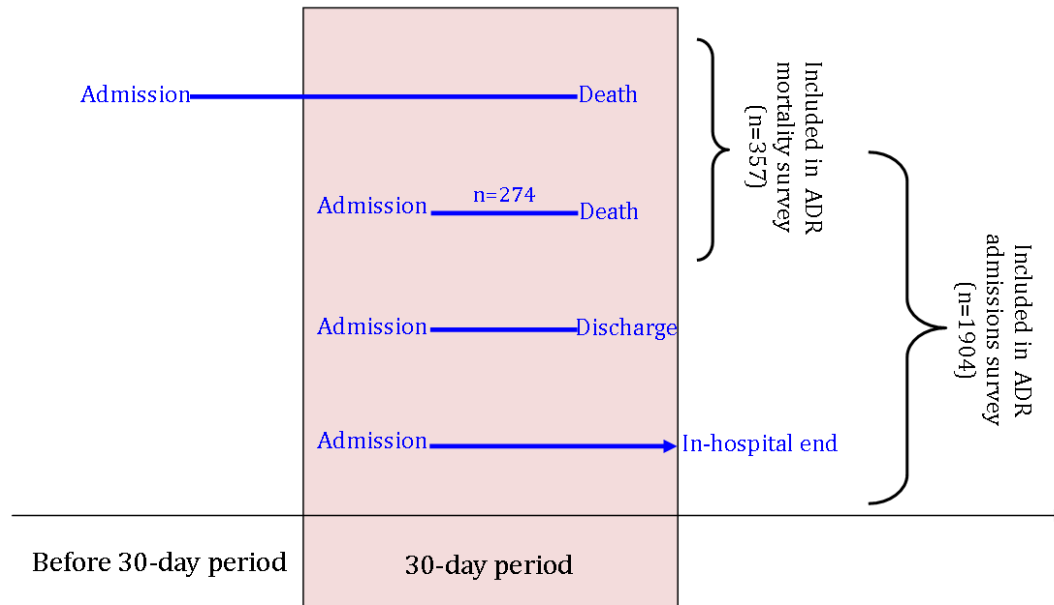

**SDC 2.** Schematic representation of overlap in the denominator of the current survey (n=1904) and a previously published survey (n=357) on ADR-related mortality.<sup>1</sup> There were 274 patients who were included in the denominator of both surveys.

1. Mouton JP, Mehta U, Parrish AG, et al. Mortality from adverse drug reactions in adult medical inpatients at four hospitals in South Africa: a cross-sectional survey. *Br J Clin Pharmacol.* 2015;80(4):818-826.

**SDC 3.** List of triggers used to identify suspected adverse drug reactions.

| <b>Event triggers</b>                                                                                                                                                                                                                                                            | <b>Drug order triggers</b>                                                                                                                                                                                                         | <b>Laboratory result triggers</b>                                                                                                                                                                                                                                                                                                                                                                                                                                                                                                                                               | <b>Suspected ADR</b>                               |
|----------------------------------------------------------------------------------------------------------------------------------------------------------------------------------------------------------------------------------------------------------------------------------|------------------------------------------------------------------------------------------------------------------------------------------------------------------------------------------------------------------------------------|---------------------------------------------------------------------------------------------------------------------------------------------------------------------------------------------------------------------------------------------------------------------------------------------------------------------------------------------------------------------------------------------------------------------------------------------------------------------------------------------------------------------------------------------------------------------------------|----------------------------------------------------|
| <ul style="list-style-type: none"> <li>• Angioedema</li> <li>• Bronchospasm</li> <li>• Lip swelling</li> <li>• Rash or ulceration</li> </ul>                                                                                                                                     | <ul style="list-style-type: none"> <li>• Adrenaline/epinephrine</li> <li>• Antihistamine</li> <li>• Corticosteroid</li> <li>• Promethazine for HSR</li> </ul>                                                                      |                                                                                                                                                                                                                                                                                                                                                                                                                                                                                                                                                                                 | <b>Hypersensitivity reaction</b>                   |
|                                                                                                                                                                                                                                                                                  | <ul style="list-style-type: none"> <li>• Flumazenil</li> <li>• Naloxone</li> </ul>                                                                                                                                                 | <ul style="list-style-type: none"> <li>• Amikacin peak &gt; 30 or trough &gt; 2 mg/L</li> <li>• Carbamazepine &gt; 45 µmol/L</li> <li>• Digoxin &gt; 1.5 nmol/L</li> <li>• Gentamicin peak &gt; 8 or trough &gt; 1 mg/L</li> <li>• Phenobarbital &gt; 160 µmol/L</li> <li>• Phenytoin &gt; 80 µmol/L</li> <li>• Theophylline &gt; 110 µmol/L</li> <li>• Tobramycin peak &gt; 8 or trough &gt; 1 mg/L</li> <li>• Valproic acid &gt; 700 µmol/L</li> <li>• Vancomycin &gt; 20 mg/L</li> <li>• Other toxic drug concentration</li> <li>• Paracetamol concentration done</li> </ul> | <b>Toxic drug effect</b>                           |
| <ul style="list-style-type: none"> <li>• Fracture</li> <li>• Osteonecrosis</li> </ul>                                                                                                                                                                                            |                                                                                                                                                                                                                                    |                                                                                                                                                                                                                                                                                                                                                                                                                                                                                                                                                                                 | <b>Drug-induced bone disease</b>                   |
| <ul style="list-style-type: none"> <li>• Bone marrow biopsy</li> </ul>                                                                                                                                                                                                           | <ul style="list-style-type: none"> <li>• GCSF/meropenem</li> </ul>                                                                                                                                                                 | <ul style="list-style-type: none"> <li>• Haemoglobin &lt; 8 g/dL</li> <li>• Pancytopenia</li> <li>• Platelets &lt; 50 x 10<sup>9</sup>/L</li> <li>• White blood cell count &lt; 1.5 x 10<sup>9</sup>/L</li> </ul>                                                                                                                                                                                                                                                                                                                                                               | <b>Drug-induced bone marrow suppression</b>        |
| <ul style="list-style-type: none"> <li>• New arrhythmia</li> <li>• New cardiac failure</li> <li>• New hypotension</li> <li>• Torsades de pointes</li> </ul>                                                                                                                      | <ul style="list-style-type: none"> <li>• Atropine</li> <li>• Magnesium sulphate</li> </ul>                                                                                                                                         |                                                                                                                                                                                                                                                                                                                                                                                                                                                                                                                                                                                 | <b>Drug-induced cardiovascular problem</b>         |
| <ul style="list-style-type: none"> <li>• Ataxia</li> <li>• Decreased LOC</li> <li>• Delirium</li> <li>• Dizziness</li> <li>• Dyskinesia</li> <li>• Dystonia</li> <li>• Falls</li> <li>• Lethargy</li> <li>• Oversedation</li> <li>• Seizure(s)</li> <li>• Torticollis</li> </ul> | <ul style="list-style-type: none"> <li>• Biperidin</li> <li>• Diazepam for EPSE</li> <li>• Diazepam for seizure</li> <li>• Lorazepam stat for seizure</li> <li>• Phenytoin for seizure</li> <li>• Promethazine for EPSE</li> </ul> |                                                                                                                                                                                                                                                                                                                                                                                                                                                                                                                                                                                 | <b>Drug-induced central nervous system problem</b> |
| <ul style="list-style-type: none"> <li>• Bleeding</li> </ul>                                                                                                                                                                                                                     | <ul style="list-style-type: none"> <li>• Fresh frozen plasma</li> <li>• Protamine sulphate</li> <li>• Vitamin K</li> </ul>                                                                                                         | <ul style="list-style-type: none"> <li>• International normalised ratio (INR) &gt; 5</li> <li>• Partial thromboplastin time (PTT) &gt; 100 seconds</li> </ul>                                                                                                                                                                                                                                                                                                                                                                                                                   | <b>Drug-induced coagulation problem</b>            |
|                                                                                                                                                                                                                                                                                  | <ul style="list-style-type: none"> <li>• Calcium gluconate</li> <li>• Insulin with glucose</li> <li>• Polystyrene sulfate</li> </ul>                                                                                               | <ul style="list-style-type: none"> <li>• Potassium &lt; 3.5 mmol/L</li> <li>• Potassium &gt; 5.5 mmol/L</li> </ul>                                                                                                                                                                                                                                                                                                                                                                                                                                                              | <b>Drug-induced electrolyte disturbance</b>        |
| <ul style="list-style-type: none"> <li>• Gastroscopy</li> <li>• Nausea and vomiting</li> </ul>                                                                                                                                                                                   | <ul style="list-style-type: none"> <li>• Antidiarrhoeals</li> <li>• Antiemetic</li> <li>• Metoclopramide</li> </ul>                                                                                                                | <ul style="list-style-type: none"> <li>• <i>Clostridium difficile</i> after antibiotics</li> </ul>                                                                                                                                                                                                                                                                                                                                                                                                                                                                              | <b>Drug-induced gastrointestinal problem</b>       |
|                                                                                                                                                                                                                                                                                  | <ul style="list-style-type: none"> <li>• Dextrose 50%</li> </ul>                                                                                                                                                                   | <ul style="list-style-type: none"> <li>• Glucose &lt; 3 mmol/L</li> </ul>                                                                                                                                                                                                                                                                                                                                                                                                                                                                                                       | <b>Drug-induced hypoglycaemia</b>                  |
| <ul style="list-style-type: none"> <li>• New jaundice</li> <li>• Liver biopsy</li> </ul>                                                                                                                                                                                         |                                                                                                                                                                                                                                    | <ul style="list-style-type: none"> <li>• Alanine transaminase (ALT) &gt; 3x ULN</li> <li>• Bilirubin &gt; 2x ULN</li> </ul>                                                                                                                                                                                                                                                                                                                                                                                                                                                     | <b>Drug-induced liver injury</b>                   |
| <ul style="list-style-type: none"> <li>• Renal biopsy</li> </ul>                                                                                                                                                                                                                 |                                                                                                                                                                                                                                    | <ul style="list-style-type: none"> <li>• eGFR worsening / single new low</li> <li>• CrCl worsening / single new low</li> <li>• Creatinine rising / single new high</li> </ul>                                                                                                                                                                                                                                                                                                                                                                                                   | <b>Drug-induced renal impairment</b>               |
| <ul style="list-style-type: none"> <li>• Abrupt drug stop</li> <li>• HCW suspects ADR</li> <li>• Transfer to higher level of care</li> </ul>                                                                                                                                     |                                                                                                                                                                                                                                    |                                                                                                                                                                                                                                                                                                                                                                                                                                                                                                                                                                                 | <b>Event suggests ADR</b>                          |

ADR: adverse drug reaction; CrCl: creatinine clearance; eGFR: estimated glomerular filtration rate; EPSE: extrapyramidal side effects; GCSF: granulocyte colony stimulating factor; HCW: healthcare worker; HSR: hypersensitivity reaction; LOC: level of consciousness; ULN: upper limit of normal

*Mouton JP, Njuguna C, Kramer N, Stewart A, Mehta U, Blockman M, et al.*  
**Adverse drug reactions causing admission to medical wards: a cross-sectional survey at four hospitals in South Africa.**  
**Supplemental Digital Content**

**SDC 4.** Prevalence of comorbidities, according to ICD-10 classification, over the 4-week period prior to patients' first admission (n=1904 patients).

| ICD-10 Chapter / Diagnostic Block                                                             | Count      | Proportion  |
|-----------------------------------------------------------------------------------------------|------------|-------------|
| <b>A00-B99 CERTAIN INFECTIOUS AND PARASITIC DISEASES</b>                                      | <b>645</b> | <b>34%</b>  |
| A00-A09 Intestinal infectious diseases                                                        | 41         | 2.1%        |
| A15-A19 Tuberculosis                                                                          | 200        | 11%         |
| A30-A49 Other bacterial diseases                                                              | 18         | <1%         |
| A50-A64 Infections with a predominantly sexual mode of transmission                           | 6          | <1%         |
| A80-A89 Viral infections of the central nervous system                                        | 2          | <1%         |
| B00-B09 Viral infections characterized by skin and mucous membrane lesions                    | 6          | <1%         |
| B15-B19 Viral hepatitis                                                                       | 5          | <1%         |
| B20-B24 Human immunodeficiency virus [HIV] disease <sup>a</sup>                               | 559        | 29%         |
| B25-B34 Other viral diseases                                                                  | 2          | <1%         |
| B35-B49 Mycoses                                                                               | 57         | 2.9%        |
| B50-B64 Protozoal diseases                                                                    | 3          | <1%         |
| B85-B89 Pediculosis, acariasis and other infestations                                         | 1          | <1%         |
| B90-B94 Sequelae of infectious and parasitic diseases                                         | 2          | <1%         |
| <b>C00-D48 NEOPLASMS</b>                                                                      | <b>50</b>  | <b>2.6%</b> |
| C15-C26 Malignant neoplasms: Digestive organs                                                 | 7          | <1%         |
| C30-C39 Malignant neoplasms: Respiratory and intrathoracic organs                             | 3          | <1%         |
| C40-C41 Malignant neoplasms: Bone and articular cartilage                                     | 1          | <1%         |
| C45-C49 Malignant neoplasms: Mesothelial and soft tissue                                      | 7          | <1%         |
| C50-C50 Malignant neoplasms: Breast                                                           | 5          | <1%         |
| C51-C58 Malignant neoplasms: Female genital organs                                            | 2          | <1%         |
| C60-C63 Malignant neoplasms: Male genital organs                                              | 4          | <1%         |
| C64-C68 Malignant neoplasms: Urinary tract                                                    | 2          | <1%         |
| C69-C72 Malignant neoplasms: Eye, brain and other parts of central nervous system             | 3          | <1%         |
| C76-C80 Malignant neoplasms of ill-defined, secondary and unspecified sites                   | 3          | <1%         |
| C81-C96 Malignant neoplasms of lymphoid, haematopoietic and related tissue                    | 7          | <1%         |
| D00-D09 In situ neoplasms                                                                     | 1          | <1%         |
| D10-D36 Benign neoplasms                                                                      | 4          | <1%         |
| D37-D48 Neoplasms of uncertain or unknown behaviour                                           | 5          | <1%         |
| <b>D50-D89 DISEASES OF THE BLOOD AND HAEMOPOIESIS; CERTAIN DISORDERS OF THE IMMUNE SYSTEM</b> | <b>171</b> | <b>9.0%</b> |
| D50-D53 Nutritional anaemias                                                                  | 30         | 1.6%        |
| D55-D59 Haemolytic anaemias                                                                   | 1          | <1%         |
| D60-D64 Aplastic and other anaemias                                                           | 114        | 6.0%        |
| D65-D69 Coagulation defects, purpura and other haemorrhagic conditions                        | 33         | 1.7%        |
| D70-D77 Other diseases of blood and blood-forming organs                                      | 11         | <1%         |
| D80-D89 Certain disorders involving the immune mechanism                                      | 1          | <1%         |
| <b>E00-E90 ENDOCRINE, NUTRITIONAL AND METABOLIC DISEASES</b>                                  | <b>585</b> | <b>31%</b>  |
| E00-E07 Disorders of thyroid gland                                                            | 35         | 1.8%        |
| E10-E14 Diabetes mellitus                                                                     | 343        | 18%         |
| E15-E16 Other disorders of glucose regulation and pancreatic internal secretion               | 15         | <1%         |
| E20-E35 Disorders of other endocrine glands                                                   | 2          | <1%         |
| E40-E46 Malnutrition                                                                          | 2          | <1%         |
| E50-E64 Other nutritional deficiencies                                                        | 7          | <1%         |
| E65-E68 Obesity and other hyperalimentation                                                   | 59         | 3.1%        |
| E70-E90 Metabolic disorders                                                                   | 257        | 13%         |
| <b>F00-F99 MENTAL AND BEHAVIOURAL DISORDERS</b>                                               | <b>134</b> | <b>7.0%</b> |
| F00-F09 Organic, including symptomatic, mental disorders                                      | 44         | 2.3%        |
| F10-F19 Mental and behavioural disorders due to psychoactive substance use                    | 30         | 1.6%        |
| F20-F29 Schizophrenia, schizotypal and delusional disorders                                   | 18         | <1%         |
| F30-F39 Mood [affective] disorders                                                            | 21         | 1.1%        |
| F40-F48 Neurotic, stress-related and somatoform disorders                                     | 5          | <1%         |
| F50-F59 Behavioural syndromes associated with physiological disturbances and physical factors | 1          | <1%         |
| F70-F79 Mental retardation                                                                    | 14         | <1%         |
| F99-F99 Unspecified mental disorder                                                           | 8          | <1%         |
| <b>G00-G99 DISEASES OF THE NERVOUS SYSTEM</b>                                                 | <b>123</b> | <b>6.5%</b> |
| G00-G09 Inflammatory diseases of the central nervous system                                   | 7          | <1%         |
| G10-G14 Systemic atrophies primarily affecting the central nervous system                     | 3          | <1%         |

**Mouton JP, Njuguna C, Kramer N, Stewart A, Mehta U, Blockman M, et al.**  
**Adverse drug reactions causing admission to medical wards: a cross-sectional survey at four hospitals in South Africa.**  
**Supplemental Digital Content**

|                                                                                        |            |               |
|----------------------------------------------------------------------------------------|------------|---------------|
| G20-G26 Extrapyramidal and movement disorders                                          | 8          | <1%           |
| G30-G32 Other degenerative diseases of the nervous system                              | 2          | <1%           |
| G35-G37 Demyelinating diseases of the central nervous system                           | 2          | <1%           |
| G40-G47 Episodic and paroxysmal disorders                                              | 87         | 4.6%          |
| G50-G59 Nerve, nerve root and plexus disorders                                         | 3          | <1%           |
| G60-G64 Polyneuropathies and other disorders of the peripheral nervous system          | 6          | <1%           |
| G70-G73 Diseases of myoneural junction and muscle                                      | 1          | <1%           |
| G80-G83 Cerebral palsy and other paralytic syndromes                                   | 7          | <1%           |
| G90-G99 Other disorders of the nervous system                                          | 4          | <1%           |
| <b>H00-H59 DISEASES OF THE EYE AND ADNEXA</b>                                          | <b>32</b>  | <b>1.7%</b>   |
| H15-H22 Disorders of sclera, cornea, iris and ciliary body                             | 2          | <1%           |
| H25-H28 Disorders of lens                                                              | 4          | <1%           |
| H30-H36 Disorders of choroid and retina                                                | 6          | <1%           |
| H40-H42 Glaucoma                                                                       | 8          | <1%           |
| H46-H48 Disorders of optic nerve and visual pathways                                   | 2          | <1%           |
| H53-H54 Visual disturbances and blindness                                              | 12         | <1%           |
| H55-H59 Other disorders of eye and adnexa                                              | 1          | <1%           |
| <b>H60-H95 DISEASES OF THE EAR AND MASTOID PROCESS</b>                                 | <b>13</b>  | <b>&lt;1%</b> |
| H65-H75 Diseases of middle ear and mastoid                                             | 1          | <1%           |
| H80-H83 Diseases of inner ear                                                          | 1          | <1%           |
| H90-H95 Other disorders of ear                                                         | 11         | <1%           |
| <b>I00-I99 DISEASES OF THE CIRCULATORY SYSTEM</b>                                      | <b>845</b> | <b>44%</b>    |
| I00-I02 Acute rheumatic fever                                                          | 2          | <1%           |
| I05-I09 Chronic rheumatic heart diseases                                               | 22         | 1.2%          |
| I10-I15 Hypertensive diseases                                                          | 691        | 36%           |
| I20-I25 Ischaemic heart diseases                                                       | 123        | 6.5%          |
| I26-I28 Pulmonary heart disease and diseases of pulmonary circulation                  | 39         | 2.0%          |
| I30-I52 Other forms of heart disease                                                   | 194        | 10%           |
| I60-I69 Cerebrovascular diseases                                                       | 112        | 5.9%          |
| I70-I79 Diseases of arteries, arterioles and capillaries                               | 21         | 1.1%          |
| I80-I89 Diseases of veins, lymphatic vessels and lymph nodes, not elsewhere classified | 18         | <1%           |
| I95-I99 Other and unspecified disorders of the circulatory system                      | 5          | <1%           |
| <b>J00-J99 DISEASES OF THE RESPIRATORY SYSTEM</b>                                      | <b>283</b> | <b>15%</b>    |
| J00-J06 Acute upper respiratory infections                                             | 3          | <1%           |
| J09-J18 Influenza and pneumonia                                                        | 38         | 2.0%          |
| J20-J22 Other acute lower respiratory infections                                       | 43         | 2.3%          |
| J30-J39 Other diseases of upper respiratory tract                                      | 5          | <1%           |
| J40-J47 Chronic lower respiratory diseases                                             | 167        | 8.8%          |
| J60-J70 Lung diseases due to external agents                                           | 7          | <1%           |
| J80-J84 Other respiratory diseases principally affecting the interstitium              | 12         | <1%           |
| J85-J86 Suppurative and necrotic conditions of lower respiratory tract                 | 2          | <1%           |
| J90-J94 Other diseases of pleura                                                       | 16         | <1%           |
| J95-J99 Other diseases of the respiratory system                                       | 17         | <1%           |
| <b>K00-K93 DISEASES OF THE DIGESTIVE SYSTEM</b>                                        | <b>133</b> | <b>7.0%</b>   |
| K00-K14 Diseases of oral cavity, salivary glands and jaws                              | 3          | <1%           |
| K20-K31 Diseases of oesophagus, stomach and duodenum                                   | 54         | 2.8%          |
| K35-K38 Diseases of appendix                                                           | 1          | <1%           |
| K40-K46 Hernia                                                                         | 2          | <1%           |
| K50-K52 Noninfective enteritis and colitis                                             | 4          | <1%           |
| K55-K64 Other diseases of intestines                                                   | 40         | 2.1%          |
| K65-K67 Diseases of peritoneum                                                         | 3          | <1%           |
| K70-K77 Diseases of liver                                                              | 19         | <1%           |
| K80-K87 Disorders of gallbladder, biliary tract and pancreas                           | 7          | <1%           |
| K90-K93 Other diseases of the digestive system                                         | 13         | <1%           |
| <b>L00-L99 DISEASES OF THE SKIN AND SUBCUTANEOUS TISSUE</b>                            | <b>44</b>  | <b>2.3%</b>   |
| L00-L08 Infections of the skin and subcutaneous tissue                                 | 12         | <1%           |
| L10-L14 Bullous disorders                                                              | 1          | <1%           |
| L20-L30 Dermatitis and eczema                                                          | 5          | <1%           |
| L40-L45 Papulosquamous disorders                                                       | 7          | <1%           |
| L60-L75 Disorders of skin appendages                                                   | 2          | <1%           |
| L80-L99 Other disorders of the skin and subcutaneous tissue                            | 18         | <1%           |

**Mouton JP, Njuguna C, Kramer N, Stewart A, Mehta U, Blockman M, et al.**  
**Adverse drug reactions causing admission to medical wards: a cross-sectional survey at four hospitals in South Africa.**  
**Supplemental Digital Content**

|                                                                                               |            |               |
|-----------------------------------------------------------------------------------------------|------------|---------------|
| <b>M00-M99 DISEASES OF THE MUSCULOSKELETAL SYSTEM AND CONNECTIVE TISSUE</b>                   | <b>101</b> | <b>5.3%</b>   |
| M00-M03 Arthropathies: Infectious arthropathies                                               | 1          | <1%           |
| M05-M14 Arthropathies: Inflammatory polyarthropathies                                         | 51         | 2.7%          |
| M15-M19 Arthropathies: Arthrosis                                                              | 17         | <1%           |
| M20-M25 Arthropathies: Other joint disorders                                                  | 6          | <1%           |
| M30-M36 Systemic connective tissue disorders                                                  | 8          | <1%           |
| M40-M43 Dorsopathies: Deforming dorsopathies                                                  | 2          | <1%           |
| M45-M49 Dorsopathies: Spondylopathies                                                         | 2          | <1%           |
| M50-M54 Dorsopathies: Other dorsopathies                                                      | 8          | <1%           |
| M60-M63 Soft tissue disorders: Disorders of muscles                                           | 3          | <1%           |
| M70-M79 Soft tissue disorders: Other soft tissue disorders                                    | 7          | <1%           |
| M80-M85 Osteopathies and chondropathies: Disorders of bone density and structure              | 2          | <1%           |
| <b>N00-N99 DISEASES OF THE GENITOURINARY SYSTEM</b>                                           | <b>373</b> | <b>20%</b>    |
| N00-N08 Glomerular diseases                                                                   | 6          | <1%           |
| N10-N16 Renal tubulo-interstitial diseases                                                    | 4          | <1%           |
| N17-N19 Renal failure                                                                         | 323        | 17%           |
| N20-N23 Urolithiasis                                                                          | 1          | <1%           |
| N25-N29 Other disorders of kidney and ureter                                                  | 2          | <1%           |
| N30-N39 Other diseases of urinary system                                                      | 33         | 1.7%          |
| N40-N51 Diseases of male genital organs                                                       | 14         | <1%           |
| N60-N64 Disorders of breast                                                                   | 1          | <1%           |
| N70-N77 Inflammatory diseases of female pelvic organs                                         | 5          | <1%           |
| N80-N98 Noninflammatory disorders of female genital tract                                     | 7          | <1%           |
| <b>O00-O99 PREGNANCY, CHILDBIRTH AND THE PUERPERIUM</b>                                       | <b>6</b>   | <b>&lt;1%</b> |
| O10-O16 Oedema, proteinuria and hypertensive disorders in pregnancy, childbirth, puerperium   | 3          | <1%           |
| O30-O48 Maternal care related to the fetus and amniotic cavity and possible delivery problems | 1          | <1%           |
| O80-O84 Delivery                                                                              | 3          | <1%           |
| <b>Q00-Q99 CONGENITAL MALFORMATIONS, DEFORMATIONS AND CHROMOSOMAL ABNORMALITIES</b>           | <b>7</b>   | <b>&lt;1%</b> |
| Q00-Q07 Congenital malformations of the nervous system                                        | 1          | <1%           |
| Q30-Q34 Congenital malformations of the respiratory system                                    | 1          | <1%           |
| Q38-Q45 Other congenital malformations of the digestive system                                | 1          | <1%           |
| Q60-Q64 Congenital malformations of the urinary system                                        | 1          | <1%           |
| Q80-Q89 Other congenital malformations                                                        | 3          | <1%           |
| <b>S00-T98 INJURY, POISONING AND CERTAIN OTHER CONSEQUENCES OF EXTERNAL CAUSES</b>            | <b>20</b>  | <b>1.1%</b>   |
| S00-S09 Injuries to the head                                                                  | 2          | <1%           |
| S20-S29 Injuries to the thorax                                                                | 1          | <1%           |
| S40-S49 Injuries to the shoulder and upper arm                                                | 1          | <1%           |
| S50-S59 Injuries to the elbow and forearm                                                     | 1          | <1%           |
| S70-S79 Injuries to the hip and thigh                                                         | 4          | <1%           |
| S80-S89 Injuries to the knee and lower leg                                                    | 1          | <1%           |
| S90-S99 Injuries to the ankle and foot                                                        | 1          | <1%           |
| T08-T14 Injuries to unspecified parts of trunk, limb or body region                           | 1          | <1%           |
| T20-T32 Burns and corrosions                                                                  | 1          | <1%           |
| T36-T50 Poisoning by drugs, medicaments and biological substances                             | 1          | <1%           |
| T51-T65 Toxic effects of substances chiefly nonmedicinal as to source                         | 1          | <1%           |
| T66-T78 Other and unspecified effects of external causes                                      | 1          | <1%           |
| T80-T88 Complications of surgical and medical care, not elsewhere classified                  | 3          | <1%           |
| T90-T98 Sequelae of injuries, of poisoning and of other consequences of external causes       | 1          | <1%           |
| <b>V01-Y98 EXTERNAL CAUSES OF MORBIDITY AND MORALITY</b>                                      | <b>11</b>  | <b>&lt;1%</b> |
| V80-V89 Accidents: Transport accidents: Other land transport accidents                        | 1          | <1%           |
| W00-W19 Accidents: Other external causes of accidental injury: Falls                          | 1          | <1%           |
| X60-X84 Intentional self-harm                                                                 | 3          | <1%           |
| X85-Y09 Assault                                                                               | 2          | <1%           |
| Y60-Y69 Complications of care: Misadventures                                                  | 1          | <1%           |
| Y83-Y84 Complications of care: Without mention of misadventure                                | 1          | <1%           |
| Y90-Y98 Supplementary factors related to causes of morbidity and mortality                    | 2          | <1%           |
| <b>Z00-Z99 FACTORS INFLUENCING HEALTH STATUS AND CONTACT WITH HEALTH SERVICES</b>             | <b>318</b> | <b>17%</b>    |
| Z00-Z13 Persons encountering health services for examination and investigation                | 1          | <1%           |
| Z20-Z29 Persons with potential health hazards related to communicable diseases                | 4          | <1%           |
| Z30-Z39 Persons encountering health services in circumstances related to reproduction         | 1          | <1%           |
| Z40-Z54 Persons encountering health services for specific procedures and health care          | 1          | <1%           |



**Mouton JP, Njuguna C, Kramer N, Stewart A, Mehta U, Blockman M, et al.**  
**Adverse drug reactions causing admission to medical wards: a cross-sectional survey at four hospitals in South Africa.**  
**Supplemental Digital Content**

|                                                                                          |     |      |
|------------------------------------------------------------------------------------------|-----|------|
| Z55-Z65 Potential health hazards related to socioeconomic and psychosocial circumstances | 6   | <1%  |
| Z70-Z76 Persons encountering health services in other circumstances                      | 65  | 3.4% |
| Z80-Z99 Persons with potential health hazards related to family and personal history     | 275 | 14%  |

(a) HIV infection diagnosed during hospital admission was considered to have been present in the four weeks prior to the admission and to therefore be a comorbid condition.

*Mouton JP, Njuguna C, Kramer N, Stewart A, Mehta U, Blockman M, et al.*  
*Adverse drug reactions causing admission to medical wards: a cross-sectional survey at four hospitals in South Africa.*  
**Supplemental Digital Content**

**SDC 5.** Prevalence of drug use, according to ATC-classification, over the 4-week period prior to patients' first admission (n=1904 patients).

| <b>Drug class / Drug</b>                                                  | <b>Count</b> | <b>Proportion</b> |
|---------------------------------------------------------------------------|--------------|-------------------|
| <b>A ALIMENTARY TRACT AND METABOLISM</b>                                  | <b>448</b>   | <b>24%</b>        |
| A02 Drugs for acid-related disorders                                      | 97           | 5.1%              |
| A02A Antacids                                                             | 9            | <1%               |
| A02AA Magnesium compounds                                                 | 1            | <1%               |
| A02AA05 Magnesium silicate                                                | 1            | <1%               |
| A02AB Aluminium compounds                                                 | 1            | <1%               |
| A02AB01 Aluminium hydroxide                                               | 1            | <1%               |
| A02AH Antacids with sodium bicarbonate                                    | 2            | <1%               |
| Unspecified antacids                                                      | 6            | <1%               |
| A02B Drugs for peptic ulcer and gastro-oesophageal reflux disease         | 93           | 4.9%              |
| A02BA H2-receptor antagonists                                             | 10           | <1%               |
| A02BA01 Cimetidine                                                        | 3            | <1%               |
| A02BA02 Ranitidine                                                        | 5            | <1%               |
| Unspecified H2-receptor antagonists                                       | 2            | <1%               |
| A02BC Proton pump inhibitors                                              | 81           | 4.3%              |
| A02BC01 Omeprazole                                                        | 74           | 3.9%              |
| A02BC02 Pantoprazole                                                      | 5            | <1%               |
| A02BC03 Lansoprazole                                                      | 2            | <1%               |
| A02BC05 Esomeprazole                                                      | 1            | <1%               |
| A02BX Other drugs for peptic ulcer and gastro-oesophageal reflux disease  | 2            | <1%               |
| Unspecified drugs for peptic ulcer and gastro-oesophageal reflux disease  | 1            | <1%               |
| A03 Drugs for functional gastrointestinal disorders                       | 43           | 2.3%              |
| A03B Belladonna and derivatives, plain                                    | 12           | <1%               |
| A03BA Belladonna alkaloids, tertiary amines                               | 1            | <1%               |
| A03BA01 Atropine                                                          | 1            | <1%               |
| A03BB Belladonna alkaloids, semisynthetic, quaternary ammonium compounds  | 11           | <1%               |
| A03BB01 Butylscopolamine                                                  | 11           | <1%               |
| A03F Propulsives                                                          | 37           | 1.9%              |
| A03FA Propulsives                                                         | 37           | 1.9%              |
| A03FA01 Metoclopramide                                                    | 36           | 1.9%              |
| A03FA03 Domperidone                                                       | 1            | <1%               |
| A04 Antiemetics and antinauseants                                         | 1            | <1%               |
| A04A Antiemetics and antinauseants                                        | 1            | <1%               |
| A04AA Serotonin (5HT3) antagonists                                        | 1            | <1%               |
| A04AA01 Ondansetron                                                       | 1            | <1%               |
| A04AA02 Granisetron                                                       | 1            | <1%               |
| A05 Bile and liver therapy                                                | 1            | <1%               |
| A05A Bile therapy                                                         | 1            | <1%               |
| A05AA Bile acid preparations                                              | 1            | <1%               |
| A05AA02 Ursodeoxycholic acid                                              | 1            | <1%               |
| A06 Laxatives                                                             | 29           | 1.5%              |
| A06A Laxatives                                                            | 29           | 1.5%              |
| A06AA Softeners, emollients                                               | 1            | <1%               |
| A06AA01 Liquid paraffin                                                   | 1            | <1%               |
| A06AB Contact laxatives                                                   | 8            | <1%               |
| A06AB02 Bisacodyl                                                         | 2            | <1%               |
| A06AB06 Senna glycosides                                                  | 7            | <1%               |
| A06AD Osmotically acting laxatives                                        | 18           | <1%               |
| A06AD11 Lactulose                                                         | 15           | <1%               |
| A06AD18 Sorbitol                                                          | 2            | <1%               |
| Unspecified osmotically acting laxatives                                  | 1            | <1%               |
| Unspecified laxatives                                                     | 3            | <1%               |
| A07 Antidiarrhoeals, intestinal anti-inflammatory / anti-infective agents | 28           | 1.5%              |
| A07A Intestinal anti-infectives                                           | 7            | <1%               |
| A07AA Antibiotics                                                         | 7            | <1%               |
| A07AA02 Nystatin                                                          | 7            | <1%               |

**Mouton JP, Njuguna C, Kramer N, Stewart A, Mehta U, Blockman M, et al.**  
**Adverse drug reactions causing admission to medical wards: a cross-sectional survey at four hospitals in South Africa.**  
**Supplemental Digital Content**

|                                                                             |            |            |
|-----------------------------------------------------------------------------|------------|------------|
| A07B Intestinal adsorbents                                                  | 3          | <1%        |
| A07BA Charcoal preparations                                                 | 3          | <1%        |
| A07BA01 Medicinal charcoal                                                  | 3          | <1%        |
| A07C Electrolytes with carbohydrates                                        | 2          | <1%        |
| A07CA Oral rehydration salt formulations                                    | 2          | <1%        |
| A07D Antipropulsives                                                        | 12         | <1%        |
| A07DA Antipropulsives                                                       | 12         | <1%        |
| A07DA03 Loperamide                                                          | 12         | <1%        |
| A07E Intestinal anti-inflammatory agents                                    | 5          | <1%        |
| A07EC Aminosalicic acid and similar agents                                  | 5          | <1%        |
| A07EC01 Sulfasalazine                                                       | 3          | <1%        |
| A07EC02 Mesalazine                                                          | 2          | <1%        |
| Unspecified antidiarrhoeals                                                 | 2          | <1%        |
| A09 Digestives, incl. enzymes                                               | 1          | <1%        |
| A09A Digestives, incl. enzymes                                              | 1          | <1%        |
| A09AA Enzyme preparations                                                   | 1          | <1%        |
| A09AA02 Multienzymes (lipase, protease etc.)                                | 1          | <1%        |
| A10 Drugs used in diabetes                                                  | 321        | 17%        |
| A10A Insulins and analogues                                                 | 130        | 6.8%       |
| A10AB Insulins and analogues, fast-acting                                   | 16         | <1%        |
| A10AC Insulins and analogues, intermediate-acting                           | 18         | <1%        |
| A10AD Insulins and analogues, intermediate-acting combined with fast-acting | 78         | 4.1%       |
| A10AE Insulins and analogues, long-acting                                   | 1          | <1%        |
| Insulin, type unspecified                                                   | 30         | 1.6%       |
| A10B Oral blood glucose lowering drugs                                      | 225        | 12%        |
| A10BA Biguanides                                                            | 190        | 10%        |
| A10BA02 Metformin                                                           | 190        | 10%        |
| A10BB Sulfonamides, urea derivatives                                        | 109        | 5.7%       |
| A10BB01 Glibenclamide                                                       | 43         | 2.3%       |
| A10BB09 Gliclazide                                                          | 66         | 3.5%       |
| Unspecified oral blood glucose lowering drugs                               | 11         | <1%        |
| Unspecified treatment for diabetes                                          | 18         | <1%        |
| A11 – A12 Vitamin and mineral supplements                                   | 212        | 11%        |
| <b>B BLOOD AND BLOOD FORMING ORGANS</b>                                     | <b>370</b> | <b>19%</b> |
| B01 Antithrombotic agents                                                   | 305        | 16%        |
| B01A Antithrombotic agents                                                  | 305        | 16%        |
| B01AA Vitamin K antagonists                                                 | 57         | 3.0%       |
| B01AA03 Warfarin                                                            | 57         | 3.0%       |
| B01AB Heparin group                                                         | 36         | 1.9%       |
| B01AB01 Heparin                                                             | 13         | <1%        |
| B01AB05 Enoxaparin                                                          | 23         | 1.2%       |
| B01AC Platelet aggregation inhibitors, excl. heparins                       | 238        | 13%        |
| B01AC04 Clopidogrel                                                         | 10         | <1%        |
| B01AC06 Acetylsalicylic acid                                                | 238        | 13%        |
| B01AD Enzymes                                                               | 7          | <1%        |
| B01AD01 Streptokinase                                                       | 7          | <1%        |
| B02 Antihaemorrhagics                                                       | 9          | <1%        |
| B02A Antifibrinolytics                                                      | 4          | <1%        |
| B02AA Amino acids                                                           | 4          | <1%        |
| B02AA02 Tranexamic acid                                                     | 4          | <1%        |
| B02B Vitamin K and other haemostatics                                       | 5          | <1%        |
| B02BA Vitamin K                                                             | 5          | <1%        |
| B02BA01 Phytomenadione                                                      | 5          | <1%        |
| B03 Anti-anaemic preparations                                               | 77         | 4.0%       |
| B03A Iron preparations                                                      | 55         | 2.9%       |
| B03AA Iron bivalent, oral preparations                                      | 54         | 2.8%       |
| B03AA07 Ferrous sulfate                                                     | 54         | 2.8%       |
| B03AD Iron in combination with folic acid                                   | 2          | <1%        |
| B03AD02 Ferrous fumarate                                                    | 2          | <1%        |
| B03B Vitamin B12 and folic acid                                             | 51         | 2.7%       |
| B03BA Vitamin B12 (cyanocobalamin and analogues)                            | 3          | <1%        |

**Mouton JP, Njuguna C, Kramer N, Stewart A, Mehta U, Blockman M, et al.**  
**Adverse drug reactions causing admission to medical wards: a cross-sectional survey at four hospitals in South Africa.**  
**Supplemental Digital Content**

|                                                         |            |            |
|---------------------------------------------------------|------------|------------|
| B03BA01 Cyanocobalamin                                  | 3          | <1%        |
| B03BB Folic acid and derivatives                        | 48         | 2.5%       |
| B03BB01 Folic acid                                      | 48         | 2.5%       |
| B03X Other anti-anaemic preparations                    | 2          | <1%        |
| B03XA Other anti-anaemic preparations                   | 2          | <1%        |
| B03XA01 Erythropoietin                                  | 2          | <1%        |
| B05 Blood substitutes and perfusion solutions           | 12         | <1%        |
| B05B IV solutions                                       | 5          | <1%        |
| B05BA Solutions for parenteral nutrition                | 5          | <1%        |
| B05BA03 Carbohydrate solutions for parenteral nutrition | 5          | <1%        |
| B05C Irrigating solutions                               | 4          | <1%        |
| B05CX Other irrigating solutions                        | 4          | <1%        |
| B05CX01 Glucose                                         | 4          | <1%        |
| B05X IV Solution additives                              | 4          | <1%        |
| B05XA Electrolyte solutions                             | 4          | <1%        |
| B05XA01 Potassium chloride                              | 2          | <1%        |
| B05XA02 Sodium bicarbonate                              | 2          | <1%        |
| <b>C CARDIOVASCULAR SYSTEM</b>                          | <b>765</b> | <b>40%</b> |
| C01 Cardiac therapy                                     | 133        | 7.0%       |
| C01A Cardiac glycosides                                 | 40         | 2.1%       |
| C01AA Digitalis glycosides                              | 40         | 2.1%       |
| C01AA05 Digoxin                                         | 40         | 2.1%       |
| C01B Anti-arrhythmics, class I and III                  | 7          | <1%        |
| C01BA Anti-arrhythmics, class Ia                        | 1          | <1%        |
| C01BA03 Disopyramide                                    | 1          | <1%        |
| C01BD Anti-arrhythmics, class III                       | 6          | <1%        |
| C01BD01 Amiodarone                                      | 6          | <1%        |
| C01C Cardiac stimulants, excl. cardiac glycosides       | 2          | <1%        |
| C01CA Adrenergic and dopaminergic agents                | 2          | <1%        |
| C01CA24 Epinephrine                                     | 2          | <1%        |
| C01D Vasodilators used in cardiac diseases              | 85         | 4.5%       |
| C01DA Organic nitrates                                  | 85         | 4.5%       |
| C01DA02 Glyceryl trinitrate                             | 5          | <1%        |
| C01DA08 Isosorbide dinitrate                            | 67         | 3.5%       |
| C01DA14 Isosorbide mononitrate                          | 26         | 1.4%       |
| Unspecified nitrates                                    | 2          | <1%        |
| C01E Other cardiac preparations                         | 2          | <1%        |
| C01EB Other cardiac preparations                        | 2          | <1%        |
| C01EB10 Adenosine                                       | 1          | <1%        |
| C01EB17 Ivabradine                                      | 1          | <1%        |
| C02 Antihypertensives                                   | 35         | 1.8%       |
| C02A Antiadrenergic agents, centrally acting            | 2          | <1%        |
| C02AB Methyl dopa                                       | 2          | <1%        |
| C02AB01 Methyl dopa (levorotatory)                      | 2          | <1%        |
| C02C Antiadrenergic agents, peripherally acting         | 17         | <1%        |
| C02CA Alpha-adrenoreceptor antagonists                  | 17         | <1%        |
| C02CA01 Prazosin                                        | 3          | <1%        |
| C02CA04 Doxazosin                                       | 14         | <1%        |
| C02D Arteriolar smooth muscle, agents acting on         | 22         | 1.2%       |
| C02DB Hydrazinophthalazine derivatives                  | 21         | 1.1%       |
| C02DB02 Hydralazine                                     | 21         | 1.1%       |
| C02DC Pyrimidine derivatives                            | 1          | <1%        |
| C02DC01 Minoxidil                                       | 1          | <1%        |
| C03 Diuretics                                           | 559        | 29%        |
| C03A Low-ceiling diuretics, thiazides                   | 262        | 14%        |
| C03AA Thiazides, plain                                  | 260        | 14%        |
| C03AA03 Hydrochlorothiazide                             | 260        | 14%        |
| C03AB Thiazides and potassium in combination            | 2          | <1%        |
| C03AB03 Hydrochlorothiazide and potassium               | 2          | <1%        |
| C03B Low-ceiling diuretics, excl. thiazides             | 1          | <1%        |
| C03BA Sulfonamides, plain                               | 1          | <1%        |
| C03BA11 Indapamide                                      | 1          | <1%        |

**Mouton JP, Njuguna C, Kramer N, Stewart A, Mehta U, Blockman M, et al.**  
**Adverse drug reactions causing admission to medical wards: a cross-sectional survey at four hospitals in South Africa.**  
**Supplemental Digital Content**

|                                                                      |     |      |
|----------------------------------------------------------------------|-----|------|
| C03C High-ceiling diuretics                                          | 327 | 17%  |
| C03CA Sulfonamides, plain                                            | 327 | 17%  |
| C03CA01 Furosemide                                                   | 327 | 17%  |
| C03D Potassium-sparing agents                                        | 80  | 4.2% |
| C03DA Aldosterone antagonists                                        | 79  | 4.1% |
| C03DA01 Spironolactone                                               | 79  | 4.1% |
| C03DB Other potassium-sparing agents                                 | 1   | <1%  |
| C03DB01 Amiloride                                                    | 1   | <1%  |
| Unspecified diuretics                                                | 2   | <1%  |
| C05 Vasoprotectives                                                  | 1   | <1%  |
| C05A Anti-haemorrhoidals for topical use                             | 1   | <1%  |
| C05AX Other anti-haemorrhoidals for topical use                      | 1   | <1%  |
| C05AX02 Bismuth preparations, combinations                           | 1   | <1%  |
| C07 Beta-blocking agents                                             | 186 | 9.8% |
| C07A Beta-blocking agents                                            | 186 | 9.8% |
| C07AA Beta-blocking agents, non-selective                            | 6   | <1%  |
| C07AA05 Propranolol                                                  | 6   | <1%  |
| C07AB Beta-blocking agents, selective                                | 134 | 7.0% |
| C07AB03 Atenolol                                                     | 132 | 6.9% |
| C07AB07 Bisoprolol                                                   | 2   | <1%  |
| C07AG Alpha- and beta-blocking agents                                | 48  | 2.5% |
| C07AG02 Carvedilol                                                   | 48  | 2.5% |
| C08 Calcium channel blockers                                         | 240 | 13%  |
| C08C Selective calcium channel blockers with mainly vascular effects | 230 | 12%  |
| C08CA Dihydropyridine derivatives                                    | 230 | 12%  |
| C08CA01 Amlodipine                                                   | 187 | 9.8% |
| C08CA05 Nifedipine                                                   | 44  | 2.3% |
| C08D Selective calcium channel blockers with direct cardiac effects  | 10  | <1%  |
| C08DA Phenylalkylamine derivatives                                   | 9   | <1%  |
| C08DA01 Verapamil                                                    | 9   | <1%  |
| C08DB Benzothiazepine derivatives                                    | 1   | <1%  |
| C08DB01 Diltiazem                                                    | 1   | <1%  |
| C09 Agents acting on the renin-angiotensin system                    | 386 | 20%  |
| C09A ACE-inhibitors, plain                                           | 369 | 19%  |
| C09AA ACE-inhibitors, plain                                          | 369 | 19%  |
| C09AA01 Captopril                                                    | 6   | <1%  |
| C09AA02 Enalapril                                                    | 246 | 13%  |
| C09AA04 Perindopril                                                  | 117 | 6.1% |
| C09B ACE-inhibitors, combinations                                    | 4   | <1%  |
| C09BA ACE-inhibitors and diuretics                                   | 4   | <1%  |
| C09BA03 Lisinopril and diuretics                                     | 1   | <1%  |
| C09BA04 Perindopril and diuretics                                    | 3   | <1%  |
| C09C Angiotensin II antagonists, plain                               | 14  | <1%  |
| C09CA Angiotensin II antagonists, plain                              | 14  | <1%  |
| C09CA01 Losartan                                                     | 13  | <1%  |
| C09CA03 Valsartan                                                    | 1   | <1%  |
| C09D Angiotensin II antagonists, combinations                        | 1   | <1%  |
| C09DA Angiotensin II antagonists and diuretics                       | 1   | <1%  |
| C09DA07 Telmisartan and diuretics                                    | 1   | <1%  |
| C10 Serum lipid reducing agents                                      | 223 | 12%  |
| C10A Cholesterol and triglyceride reducers                           | 220 | 12%  |
| C10AA HMG-coA reductase inhibitors                                   | 217 | 11%  |
| C10AA01 Simvastatin                                                  | 208 | 11%  |
| C10AA05 Atorvastatin                                                 | 6   | <1%  |
| Unspecified statins                                                  | 3   | <1%  |
| C10AB Fibrates                                                       | 1   | <1%  |
| C10AB02 Bezafibrate                                                  | 1   | <1%  |
| C10AC Bile acid sequestrants                                         | 2   | <1%  |
| C10AC01 Cholestyramine                                               | 2   | <1%  |
| Unspecified lipid reducing agents                                    | 3   | <1%  |
| Unspecified cardiovascular agents (*)                                | 71  | 3.7% |

*Mouton JP, Njuguna C, Kramer N, Stewart A, Mehta U, Blockman M, et al.*  
*Adverse drug reactions causing admission to medical wards: a cross-sectional survey at four hospitals in South Africa.*  
**Supplemental Digital Content**

|                                                                          |            |               |
|--------------------------------------------------------------------------|------------|---------------|
| <b>D DERMATOLOGICALS</b>                                                 | <b>14</b>  | <b>&lt;1%</b> |
| D01 Antifungals for dermatological use                                   | 5          | <1%           |
| D01A Antifungals for topical use                                         | 3          | <1%           |
| D01AC Imidazole and triazole derivatives                                 | 2          | <1%           |
| D01AC01 Clotrimazole                                                     | 2          | <1%           |
| D01AE Other antifungals for topical use                                  | 1          | <1%           |
| D01AE02 Methylrosaniline (Gentian violet)                                | 1          | <1%           |
| D01B Antifungals for systemic use                                        | 2          | <1%           |
| D01BA Antifungals for systemic use                                       | 2          | <1%           |
| D01BA01 Griseofulvin                                                     | 2          | <1%           |
| D02 Emollients and protectives                                           | 3          | <1%           |
| D02A Emollients and protectives                                          | 3          | <1%           |
| D02AB Zinc products                                                      | 1          | <1%           |
| D02AX Other emollients and protectives                                   | 2          | <1%           |
| D07 Corticosteroids, dermatological preparations                         | 4          | <1%           |
| D07A Corticosteroids, plain                                              | 4          | <1%           |
| D07AA Corticosteroids, weak (Group I)                                    | 1          | <1%           |
| D07AA02 Hydrocortisone                                                   | 1          | <1%           |
| D07AC Corticosteroids, potent (Group III)                                | 3          | <1%           |
| D07AC01 Betamethasone                                                    | 3          | <1%           |
| D07AD Corticosteroids, very potent (Group IV)                            | 1          | <1%           |
| D07AD01 Clobetasol                                                       | 1          | <1%           |
| D08 Antiseptics and disinfectants                                        | 2          | <1%           |
| D08A Antiseptics and disinfectants                                       | 2          | <1%           |
| D08AG Iodine products                                                    | 1          | <1%           |
| D08AG02 Povidone-iodine                                                  | 1          | <1%           |
| D08AX Other antiseptics and disinfectants                                | 1          | <1%           |
| D08AX06 Potassium permanganate                                           | 1          | <1%           |
| <b>G GENITO-URINARY SYSTEM AND SEX HORMONES</b>                          | <b>21</b>  | <b>1.1%</b>   |
| G02 Other gynaecologicals                                                | 2          | <1%           |
| G02A Oxytocics                                                           | 1          | <1%           |
| G02AB Ergot alkaloids                                                    | 1          | <1%           |
| G02AB03 Ergometrine                                                      | 1          | <1%           |
| G02C Other gynaecologicals                                               | 1          | <1%           |
| G02CB Prolactin inhibitors                                               | 1          | <1%           |
| G02CB01 Bromocriptine                                                    | 1          | <1%           |
| G03 Sex hormones and modulators of the genital system                    | 10         | <1%           |
| G03A Hormonal contraceptives for systemic use                            | 9          | <1%           |
| G03AA Progestogens and oestrogens, fixed combinations                    | 2          | <1%           |
| G03AA07 Levonorgestrel and oestrogen                                     | 2          | <1%           |
| G03AC Progestogens                                                       | 5          | <1%           |
| G03AC01 Norethisterone                                                   | 1          | <1%           |
| G03AC06 Medroxyprogesterone                                              | 4          | <1%           |
| Unspecified hormonal contraceptives                                      | 2          | <1%           |
| Unspecified sex hormones                                                 | 1          | <1%           |
| G04 Urologicals                                                          | 9          | <1%           |
| G04B Other urologicals, incl. antispasmodics                             | 3          | <1%           |
| G04BD Urinary antispasmodics                                             | 3          | <1%           |
| G04BD04 Oxybutynin                                                       | 3          | <1%           |
| G04C Drugs used in benign prostatic hypertrophy                          | 8          | <1%           |
| G04CA Alpha-adrenoreceptor antagonists                                   | 8          | <1%           |
| G04CA02 Tamsulosin                                                       | 8          | <1%           |
| <b>H SYSTEMIC HORMONAL PREPARATIONS, EXCL. SEX HORMONES AND INSULINS</b> | <b>142</b> | <b>7.5%</b>   |
| H01 Pituitary and hypothalamic hormones and analogues                    | 1          | <1%           |
| H01C Hypothalamic hormones                                               | 1          | <1%           |
| H01CB Antigrowth hormone                                                 | 1          | <1%           |
| H01CB01 Somatostatin                                                     | 1          | <1%           |

**Mouton JP, Njuguna C, Kramer N, Stewart A, Mehta U, Blockman M, et al.**  
**Adverse drug reactions causing admission to medical wards: a cross-sectional survey at four hospitals in South Africa.**  
**Supplemental Digital Content**

|                                                                        |            |            |
|------------------------------------------------------------------------|------------|------------|
| H02 Corticosteroids for systemic use                                   | 118        | 6.2%       |
| H02A Corticosteroids for systemic use, plain                           | 118        | 6.2%       |
| H02AB Glucocorticoids                                                  | 118        | 6.2%       |
| H02AB01 Betamethasone                                                  | 1          | <1%        |
| H02AB02 Dexamethasone                                                  | 4          | <1%        |
| H02AB04 Methylprednisolone                                             | 3          | <1%        |
| H02AB06 Prednisolone                                                   | 4          | <1%        |
| H02AB07 Prednisone                                                     | 97         | 5.1%       |
| H02AB09 Hydrocortisone                                                 | 23         | 1.2%       |
| H03 Thyroid therapy                                                    | 27         | 1.4%       |
| H03A Thyroid preparations                                              | 23         | 1.2%       |
| H03AA Thyroid hormones                                                 | 23         | 1.2%       |
| H03AA01 Levothyroxine sodium                                           | 23         | 1.2%       |
| H03AA03 Combinations of levothyroxine and liothyronine                 | 1          | <1%        |
| H03B Antithyroid preparations                                          | 4          | <1%        |
| H03BB Sulfur-containing imidazole derivatives                          | 4          | <1%        |
| H03BB01 Carbimazole                                                    | 4          | <1%        |
| <b>J ANTI-INFECTIVES FOR SYSTEMIC USE</b>                              | <b>559</b> | <b>29%</b> |
| J01 Antibacterials for systemic use                                    | 240        | 13%        |
| J01A Tetracyclines                                                     | 11         | <1%        |
| J01AA Tetracyclines                                                    | 11         | <1%        |
| J01AA02 Doxycycline                                                    | 11         | <1%        |
| J01C Beta-lactam antibacterials, penicillins                           | 101        | 5.3%       |
| J01CA Penicillins with extended spectrum                               | 59         | 3.1%       |
| J01CA01 Ampicillin                                                     | 6          | <1%        |
| J01CA04 Amoxicillin                                                    | 52         | 2.7%       |
| J01CA12 Piperacillin                                                   | 1          | <1%        |
| J01CE Beta-lactamase sensitive penicillins                             | 6          | <1%        |
| J01CE01 Benzylpenicillin                                               | 4          | <1%        |
| J01CE02 Phenoxymethylpenicillin                                        | 2          | <1%        |
| J01CF Beta-lactamase resistant penicillins                             | 8          | <1%        |
| J01CF02 Cloxacillin                                                    | 4          | <1%        |
| J01CF05 Flucloxacillin                                                 | 4          | <1%        |
| J01CG Beta-lactamase inhibitors                                        | 1          | <1%        |
| J01CG02 Tazobactam                                                     | 1          | <1%        |
| J01CR Combinations of penicillins, incl. beta-lactamase inhibitors     | 39         | 2.0%       |
| J01CR02 Amoxicillin and enzyme inhibitor                               | 39         | 2.0%       |
| J01CR05 Piperacillin and enzyme inhibitor                              | 1          | <1%        |
| Unspecified penicillins                                                | 1          | <1%        |
| J01D Other beta-lactam antibacterials                                  | 57         | 3.0%       |
| J01DC Second-generation cephalosporins                                 | 5          | <1%        |
| J01DC02 Cefuroxime                                                     | 5          | <1%        |
| J01DD Third-generation cephalosporins                                  | 52         | 2.7%       |
| J01DD01 Cefotaxime                                                     | 1          | <1%        |
| J01DD04 Ceftriaxone                                                    | 50         | 2.6%       |
| J01DD08 Cefixime                                                       | 1          | <1%        |
| J01DH Carbapenems                                                      | 1          | <1%        |
| J01DH03 Ertapenem                                                      | 1          | <1%        |
| J01E Sulfonamides and trimethoprim                                     | 68         | 3.6%       |
| J01EE Combinations of sulfonamides and trimethoprim, incl. derivatives | 68         | 3.6%       |
| J01EE01 Sulfamethoxazole and trimethoprim                              | 68         | 3.6%       |
| J01F Macrolides, lincosamides and streptogramins                       | 15         | <1%        |
| J01FA Macrolides                                                       | 13         | <1%        |
| J01FA01 Erythromycin                                                   | 6          | <1%        |
| J01FA09 Clarithromycin                                                 | 4          | <1%        |
| J01FA10 Azithromycin                                                   | 3          | <1%        |
| J01FA15 Telithromycin                                                  | 1          | <1%        |
| J01FF Lincosamides                                                     | 2          | <1%        |
| J01FF01 Clindamycin                                                    | 2          | <1%        |
| J01G Aminoglycoside antibacterials                                     | 8          | <1%        |
| J01GB Other aminoglycosides                                            | 8          | <1%        |
| J01GB03 Gentamicin                                                     | 4          | <1%        |

**Mouton JP, Njuguna C, Kramer N, Stewart A, Mehta U, Blockman M, et al.**  
**Adverse drug reactions causing admission to medical wards: a cross-sectional survey at four hospitals in South Africa.**  
**Supplemental Digital Content**

|                                                                           |           |             |
|---------------------------------------------------------------------------|-----------|-------------|
| J01GB04 Kanamycin                                                         | 4         | <1%         |
| J01M Quinolone antibacterials                                             | 23        | 1.2%        |
| J01MA Fluoroquinolones                                                    | 23        | 1.2%        |
| J01MA01 Ofloxacin                                                         | 1         | <1%         |
| J01MA02 Ciprofloxacin                                                     | 17        | <1%         |
| J01MA14 Moxifloxacin                                                      | 5         | <1%         |
| J01X Other antibacterials                                                 | 1         | <1%         |
| J01XB Polymyxins                                                          | 1         | <1%         |
| J01XB01 Colistin                                                          | 1         | <1%         |
| Unspecified antibacterials                                                | 13        | <1%         |
| J02 Antimycotics for systemic use                                         | 26        | 1.4%        |
| J02A Antimycotics for systemic use                                        | 26        | 1.4%        |
| J02AC Triazole derivatives                                                | 26        | 1.4%        |
| J02AC01 Fluconazole                                                       | 25        | 1.3%        |
| J02AC02 Itraconazole                                                      | 1         | <1%         |
| J04 Antimycobacterials                                                    | 198       | 10%         |
| J04A Drugs for treatment of tuberculosis                                  | 197       | 10%         |
| J04AB Antibiotics                                                         | 179       | 9.4%        |
| J04AB02 Rifampicin                                                        | 179       | 9.4%        |
| J04AC Hydrazides                                                          | 187       | 9.8%        |
| J04AC01 Isoniazid                                                         | 187       | 9.8%        |
| J04AD Thiocarbamide derivatives                                           | 4         | <1%         |
| J04AD03 Ethionamide                                                       | 4         | <1%         |
| J04AK Other drugs for treatment of tuberculosis                           | 138       | 7.2%        |
| J04AK01 Pyrazinamide                                                      | 134       | 7.0%        |
| J04AK02 Ethambutol                                                        | 134       | 7.0%        |
| J04AK03 Terizidone                                                        | 4         | <1%         |
| Unspecified treatment for tuberculosis                                    | 4         | <1%         |
| J04B Drugs for treatment of lepra                                         | 1         | <1%         |
| J04BA Drugs for treatment of lepra                                        | 1         | <1%         |
| J04BA02 Dapsone                                                           | 1         | <1%         |
| J05 Antivirals for systemic use                                           | 320       | 17%         |
| J05A Direct-acting antivirals                                             | 320       | 17%         |
| J05AB Nucleosides and nucleotides, excl. reverse transcriptase inhibitors | 6         | <1%         |
| J05AB01 Aciclovir                                                         | 6         | <1%         |
| J05AE Protease inhibitors                                                 | 20        | 1.1%        |
| J05AE08 Atazanavir                                                        | 1         | <1%         |
| J05AE30 Lopinavir-ritonavir                                               | 19        | <1%         |
| J05AF Nucleoside and nucleotide reverse transcriptase inhibitors          | 278       | 15%         |
| J05AF01 Zidovudine                                                        | 28        | 1.5%        |
| J05AF02 Didanosine                                                        | 1         | <1%         |
| J05AF04 Stavudine                                                         | 37        | 1.9%        |
| J05AF05 Lamivudine                                                        | 213       | 11%         |
| J05AF06 Abacavir                                                          | 9         | <1%         |
| J05AF07 Tenofovir disoproxil                                              | 207       | 11%         |
| J05AF09 Emtricitabine                                                     | 62        | 3.3%        |
| J05AG Non-nucleoside reverse transcriptase inhibitors                     | 255       | 13%         |
| J05AG01 Nevirapine                                                        | 15        | <1%         |
| J05AG03 Efavirenz                                                         | 240       | 13%         |
| J05AX Other antivirals                                                    | 1         | <1%         |
| J05AX08 Raltegravir                                                       | 1         | <1%         |
| Unspecified antiretroviral therapy                                        | 41        | 2.2%        |
| J07 Vaccines                                                              | 1         | <1%         |
| J07B Viral vaccines                                                       | 1         | <1%         |
| J07BB Influenza vaccines                                                  | 1         | <1%         |
| <b>L ANTINEOPLASTIC AND IMMUNOMODULATING AGENTS</b>                       | <b>27</b> | <b>1.4%</b> |
| L01 Antineoplastic agents                                                 | 6         | <1%         |
| L01A Alkylating agents                                                    | 1         | <1%         |
| L01AA Nitrogen mustard analogues                                          | 1         | <1%         |
| L01AA02 Chlorambucil                                                      | 1         | <1%         |
| L01X Other antineoplastic agents                                          | 2         | <1%         |



**Mouton JP, Njuguna C, Kramer N, Stewart A, Mehta U, Blockman M, et al.**  
**Adverse drug reactions causing admission to medical wards: a cross-sectional survey at four hospitals in South Africa.**  
**Supplemental Digital Content**

|                                                                    |            |             |
|--------------------------------------------------------------------|------------|-------------|
| L01XE Protein kinase inhibitors                                    | 2          | <1%         |
| L01XE01 Imatinib                                                   | 2          | <1%         |
| Unspecified antineoplastic agents                                  | 3          | <1%         |
| L02 Endocrine therapy                                              | 2          | <1%         |
| L02B Hormone antagonists and related agents                        | 2          | <1%         |
| L02BA Anti-oestrogens                                              | 2          | <1%         |
| L02BA01 Tamoxifen                                                  | 2          | <1%         |
| L04 Immunosuppressive agents                                       | 19         | <1%         |
| L04A Immunosuppressive agents                                      | 19         | <1%         |
| L04AA Selective immunosuppressive agents                           | 1          | <1%         |
| L04AA06 Mycophenolic acid                                          | 1          | <1%         |
| L04AD Calcineurin inhibitors                                       | 3          | <1%         |
| L04AD01 Ciclosporin                                                | 1          | <1%         |
| L04AD02 Tacrolimus                                                 | 2          | <1%         |
| L04AX Other immunosuppressive agents                               | 16         | <1%         |
| L04AX01 Azathioprine                                               | 5          | <1%         |
| L04AX03 Methotrexate                                               | 11         | <1%         |
| <b>M MUSCULO-SKELETAL SYSTEM</b>                                   | <b>79</b>  | <b>4.1%</b> |
| M01 Anti-inflammatory and antirheumatic products                   | 49         | 2.6%        |
| M01A Anti-inflammatory and antirheumatic products, non-steroids    | 49         | 2.6%        |
| M01AB Acetic acid derivatives and related substances               | 21         | 1.1%        |
| M01AB01 Indometacin                                                | 6          | <1%         |
| M01AB05 Diclofenac                                                 | 16         | <1%         |
| M01AE Propionic acid derivatives                                   | 22         | 1.2%        |
| M01AE01 Ibuprofen                                                  | 20         | 1.1%        |
| M01AE02 Naproxen                                                   | 1          | <1%         |
| M01AE51 Ibuprofen, combinations                                    | 2          | <1%         |
| M01AG Fenamates                                                    | 1          | <1%         |
| M01AG01 Mefenamic acid                                             | 1          | <1%         |
| M01AH Coxibs                                                       | 2          | <1%         |
| M01AH01 Celecoxib                                                  | 1          | <1%         |
| M01AH04 Parecoxib                                                  | 1          | <1%         |
| Unspecified non-steroidal anti-inflammatories                      | 6          | <1%         |
| M02 Topical products for joint and muscular pain                   | 7          | <1%         |
| M02A Topical products for joint and muscular pain                  | 7          | <1%         |
| M02AA Anti-inflammatory preparations, non-steroids for topical use | 1          | <1%         |
| M02AA13 Ibuprofen                                                  | 1          | <1%         |
| M02AC Preparations with salicylic acid derivatives                 | 5          | <1%         |
| Unspecified topical products for joint and muscular pain           | 1          | <1%         |
| M03 Muscle relaxants                                               | 4          | <1%         |
| M03A Muscle relaxants, peripherally acting agents                  | 1          | <1%         |
| M03AB Choline derivatives                                          | 1          | <1%         |
| M03AB01 Suxamethonium                                              | 1          | <1%         |
| M03B Muscle relaxants, centrally acting agents                     | 3          | <1%         |
| M03BX Other centrally acting agents                                | 3          | <1%         |
| M03BX01 Baclofen                                                   | 3          | <1%         |
| M04 Antigout preparations                                          | 22         | 1.2%        |
| M04A Antigout preparations                                         | 22         | 1.2%        |
| M04AA Preparations inhibiting uric acid production                 | 18         | <1%         |
| M04AA01 Allopurinol                                                | 18         | <1%         |
| M04AC Preparations with no effect on uric acid metabolism          | 7          | <1%         |
| M04AC01 Colchicine                                                 | 7          | <1%         |
| Unspecified antigout preparations                                  | 1          | <1%         |
| M05 Drugs for treatment of bone diseases                           | 2          | <1%         |
| M05B Drugs affecting bone structure and mineralization             | 2          | <1%         |
| M05BA Bisphosphonates                                              | 2          | <1%         |
| M05BA04 Alendronic acid                                            | 2          | <1%         |
| <b>N NERVOUS SYSTEM</b>                                            | <b>427</b> | <b>22%</b>  |

**Mouton JP, Njuguna C, Kramer N, Stewart A, Mehta U, Blockman M, et al.**  
**Adverse drug reactions causing admission to medical wards: a cross-sectional survey at four hospitals in South Africa.**  
**Supplemental Digital Content**

|                                                       |     |      |
|-------------------------------------------------------|-----|------|
| N02 Analgesics                                        | 228 | 12%  |
| N02A Opioids                                          | 90  | 4.7% |
| N02AA Natural opium alkaloids                         | 32  | 1.7% |
| N02AA01 Morphine                                      | 30  | 1.6% |
| N02AA08 Dihydrocodeine                                | 2   | <1%  |
| N02AB Phenylpiperidine derivatives                    | 2   | <1%  |
| N02AB02 Pethidine                                     | 2   | <1%  |
| N02AX Other opioids                                   | 65  | 3.4% |
| N02AX02 Tramadol                                      | 63  | 3.3% |
| N02AX52 Tramadol, combinations                        | 2   | <1%  |
| N02B Other analgesics and antipyretics                | 185 | 9.7% |
| N02BE Anilides                                        | 185 | 9.7% |
| N02BE01 Paracetamol                                   | 160 | 8.4% |
| N02BE51 Paracetamol, combinations excl. psycholeptics | 31  | 1.6% |
| N02BE71 Paracetamol, combinations with psycholeptics  | 2   | <1%  |
| Unspecified analgesics                                | 6   | <1%  |
| N03 Anti-epileptics                                   | 139 | 7.3% |
| N03A Anti-epileptics                                  | 139 | 7.3% |
| N03AA Barbiturates and derivatives                    | 3   | <1%  |
| N03AA02 Phenobarbital                                 | 3   | <1%  |
| N03AB Hydantoin derivatives                           | 55  | 2.9% |
| N03AB02 Phenytoin                                     | 55  | 2.9% |
| N03AE Benzodiazepine derivatives                      | 19  | <1%  |
| N03AE01 Clonazepam                                    | 19  | <1%  |
| N03AF Carboxamide derivatives                         | 26  | 1.4% |
| N03AF01 Carbamazepine                                 | 26  | 1.4% |
| N03AG Fatty acid derivatives                          | 60  | 3.2% |
| N03AG01 Valproic acid                                 | 60  | 3.2% |
| N03AX Other anti-epileptics                           | 5   | <1%  |
| N03AX09 Lamotrigine                                   | 5   | <1%  |
| Unspecified anti-epileptics                           | 7   | <1%  |
| N04 Anti-Parkinson drugs                              | 23  | 1.2% |
| N04A Anticholinergic agents                           | 18  | <1%  |
| N04AB Ethers chemically close to antihistamines       | 18  | <1%  |
| N04AB02 Orphenadrine                                  | 18  | <1%  |
| N04B Dopaminergic agents                              | 5   | <1%  |
| N04BA Dopa and dopa derivatives                       | 5   | <1%  |
| N04BA02 Levodopa and decarboxylase inhibitor          | 5   | <1%  |
| N05 Psycholeptics                                     | 100 | 5.3% |
| N05A Antipsychotics                                   | 67  | 3.5% |
| N05AA Phenothiazines with aliphatic side-chain        | 6   | <1%  |
| N05AA01 Chlorpromazine                                | 6   | <1%  |
| N05AB Phenothiazines with piperazine structure        | 7   | <1%  |
| N05AB02 Fluphenazine                                  | 3   | <1%  |
| N05AB04 Prochlorperazine                              | 4   | <1%  |
| N05AD Butyrophenone derivatives                       | 33  | 1.7% |
| N05AD01 Haloperidol                                   | 33  | 1.7% |
| N05AF Thioxanthene derivatives                        | 6   | <1%  |
| N05AF01 Flupentixol                                   | 2   | <1%  |
| N05AF05 Zuclopenthixol                                | 4   | <1%  |
| N05AH Diazepines, oxazepines and thiazepines          | 6   | <1%  |
| N05AH02 Clozapine                                     | 2   | <1%  |
| N05AH04 Quetiapine                                    | 4   | <1%  |
| N05AN Lithium                                         | 1   | <1%  |
| N05AN01 Lithium                                       | 1   | <1%  |
| N05AX Other antipsychotics                            | 11  | <1%  |
| N05AX08 Risperidone                                   | 11  | <1%  |
| Unspecified antipsychotics                            | 4   | <1%  |
| N05B Anxiolytics                                      | 40  | 2.1% |
| N05BA Benzodiazepine derivatives                      | 40  | 2.1% |
| N05BA01 Diazepam                                      | 24  | 1.3% |
| N05BA04 Oxazepam                                      | 4   | <1%  |
| N05BA06 Lorazepam                                     | 13  | <1%  |

**Mouton JP, Njuguna C, Kramer N, Stewart A, Mehta U, Blockman M, et al.**  
**Adverse drug reactions causing admission to medical wards: a cross-sectional survey at four hospitals in South Africa.**  
**Supplemental Digital Content**

|                                                                      |            |             |
|----------------------------------------------------------------------|------------|-------------|
| N05C Hypnotics and sedatives                                         | 9          | <1%         |
| N05CD Benzodiazepine derivatives                                     | 4          | <1%         |
| N05CD08 Midazolam                                                    | 4          | <1%         |
| N05CF Benzodiazepine-related drugs                                   | 5          | <1%         |
| N05CF01 Zopiclone                                                    | 4          | <1%         |
| N05CF02 Zolpidem                                                     | 1          | <1%         |
| N06 Psychoanaleptics                                                 | 63         | 3.3%        |
| N06A Antidepressants                                                 | 63         | 3.3%        |
| N06AA Non-selective monoamine reuptake inhibitors                    | 45         | 2.4%        |
| N06AA09 Amitriptyline                                                | 42         | 2.2%        |
| Unspecified non-selective monoamine reuptake inhibitors              | 3          | <1%         |
| N06AB Selective serotonin reuptake inhibitors                        | 13         | <1%         |
| N06AB03 Fluoxetine                                                   | 9          | <1%         |
| N06AB04 Citalopram                                                   | 5          | <1%         |
| N06AX Other antidepressants                                          | 3          | <1%         |
| N06AX03 Mianserin                                                    | 2          | <1%         |
| N06AX16 Venlafaxine                                                  | 1          | <1%         |
| Unspecified antidepressants                                          | 2          | <1%         |
| N07 Other nervous system drugs                                       | 1          | <1%         |
| N07A Parasympathomimetics                                            | 1          | <1%         |
| N07AA Anticholinesterases                                            | 1          | <1%         |
| N07AA02 Pyridostigmine                                               | 1          | <1%         |
| Unspecified drugs acting on the nervous system                       | 3          | <1%         |
| <b>P ANTIPARASITIC PRODUCTS, INSECTICIDES AND REPELLENTS</b>         | <b>36</b>  | <b>1.9%</b> |
| P01 Antiprotozoals                                                   | 35         | 1.8%        |
| P01A Agents against amoebiasis and other protozoal diseases          | 26         | 1.4%        |
| P01AB Nitroimidazole derivatives                                     | 26         | 1.4%        |
| P01AB01 Metronidazole                                                | 26         | 1.4%        |
| P01B Antimalarials                                                   | 9          | <1%         |
| P01BA Aminoquinolines                                                | 9          | <1%         |
| P01BA01 Chloroquine                                                  | 9          | <1%         |
| P03 Ectoparasiticides, incl. scabicides, insecticides and repellents | 1          | <1%         |
| P03A Ectoparasiticides, incl. scabicides                             | 1          | <1%         |
| P03AA Sulfur-containing products                                     | 1          | <1%         |
| Monosulfiram                                                         | 1          | <1%         |
| <b>R RESPIRATORY SYSTEM</b>                                          | <b>219</b> | <b>12%</b>  |
| R01 Nasal preparations                                               | 7          | <1%         |
| R01A Decongestants and other nasal preparations for topical use      | 7          | <1%         |
| R01AA Sympathomimetics, plain                                        | 1          | <1%         |
| R01AA05 Oxymetazoline                                                | 1          | <1%         |
| R01AD Corticosteroids                                                | 6          | <1%         |
| R01AD01 Beclometasone                                                | 6          | <1%         |
| R02 Throat preparations                                              | 2          | <1%         |
| R02A Throat preparations                                             | 2          | <1%         |
| R02AA Antiseptics                                                    | 2          | <1%         |
| R02AA20 Various throat antiseptics                                   | 2          | <1%         |
| R03 Drugs for obstructive airway                                     | 194        | 10%         |
| R03A Adrenergics, inhalants                                          | 149        | 7.8%        |
| R03AA Alpha- and beta-adrenoreceptor agonists                        | 1          | <1%         |
| R03AA01 Epinephrine                                                  | 1          | <1%         |
| R03AC Selective beta-2-adrenoreceptor agonists                       | 148        | 7.8%        |
| R03AC02 Salbutamol                                                   | 144        | 7.6%        |
| R03AC04 Fenoterol                                                    | 5          | <1%         |
| R03AC12 Salmeterol                                                   | 3          | <1%         |
| R03AC13 Formoterol                                                   | 8          | <1%         |
| Unspecified beta-adrenergic inhalant                                 | 1          | <1%         |
| R03AK Adrenergics and other drugs for obstructive airway diseases    | 1          | <1%         |
| R03AK06 Salmeterol and other drugs for obstructive airway diseases   | 1          | <1%         |

**Mouton JP, Njuguna C, Kramer N, Stewart A, Mehta U, Blockman M, et al.**  
**Adverse drug reactions causing admission to medical wards: a cross-sectional survey at four hospitals in South Africa.**  
**Supplemental Digital Content**

|                                                                   |           |               |
|-------------------------------------------------------------------|-----------|---------------|
| R03B Other drugs for obstructive airway diseases, inhalants       | 103       | 5.4%          |
| R03BA Glucocorticoids                                             | 88        | 4.6%          |
| R03BA01 Beclometasone                                             | 16        | <1%           |
| R03BA02 Budesonide                                                | 74        | 3.9%          |
| Unspecified inhaled corticosteroid                                | 1         | <1%           |
| R03BB Anticholinergics                                            | 36        | 1.9%          |
| R03BB01 Ipratropium bromide                                       | 35        | 1.8%          |
| R03BB04 Tiotropium bromide                                        | 1         | <1%           |
| R03C Adrenergics for systemic use                                 | 3         | <1%           |
| R03CC Selective beta-2-adrenoreceptor agonists                    | 3         | <1%           |
| R03CC02 Salbutamol                                                | 3         | <1%           |
| R03D Other systemic drugs for obstructive airway diseases         | 67        | 3.5%          |
| R03DA Xanthines                                                   | 67        | 3.5%          |
| R03DA04 Theophylline                                              | 64        | 3.4%          |
| R03DA05 Aminophylline                                             | 2         | <1%           |
| R03DA54 Theophylline, combinations excl. psycholeptics            | 2         | <1%           |
| Unspecified treatment for obstructive airway diseases             | 28        | 1.5%          |
| R05 Cough and cold preparations                                   | 5         | <1%           |
| Unspecified cough and cold preparations                           | 5         | <1%           |
| R06 Antihistamines for systemic use                               | 29        | 1.5%          |
| R06A Antihistamines for systemic use                              | 29        | 1.5%          |
| R06AA Aminoalkyl ethers                                           | 3         | <1%           |
| R06AA02 Diphenhydramine                                           | 3         | <1%           |
| R06AB Substituted alkylamines                                     | 14        | <1%           |
| R06AB04 Chlorphenamine                                            | 14        | <1%           |
| R06AD Phenothiazine derivatives                                   | 6         | <1%           |
| R06AD02 Promethazine                                              | 6         | <1%           |
| R06AE Piperazine derivatives                                      | 8         | <1%           |
| R06AE03 Cyclizine                                                 | 2         | <1%           |
| R06AE07 Cetirizine                                                | 6         | <1%           |
| R06AX Other antihistamines for systemic use                       | 1         | <1%           |
| R06AX13 Loratadine                                                | 1         | <1%           |
| Unspecified systemic antihistamines                               | 1         | <1%           |
| <b>S SENSORY ORGANS</b>                                           | <b>8</b>  | <b>&lt;1%</b> |
| S01 Ophthalmologicals                                             | 8         | <1%           |
| S01C Anti-inflammatory agents and anti-infectives in combination  | 1         | <1%           |
| S01CA Corticosteroids and anti-infectives in combination          | 1         | <1%           |
| S01CA01 Dexamethasone and anti-infectives                         | 1         | <1%           |
| S01E Antiglaucoma preparations and miotics                        | 3         | <1%           |
| S01EA Sympathomimetics in glaucoma therapy                        | 1         | <1%           |
| S01EA05 Brimonidine                                               | 1         | <1%           |
| S01ED Beta-blocking agents                                        | 2         | <1%           |
| S01ED02 Betaxolol                                                 | 1         | <1%           |
| S01ED51 Timolol, combinations                                     | 1         | <1%           |
| S01K Surgical aids                                                | 1         | <1%           |
| S01KA Viscoelastic substances                                     | 1         | <1%           |
| S01KA02 Hypromellose                                              | 1         | <1%           |
| S01X Other ophthalmologicals                                      | 1         | <1%           |
| S01XA Other ophthalmological                                      | 1         | <1%           |
| S01XA20 Artificial tears and other indifferent preparations       | 1         | <1%           |
| Unspecified ophthalmologicals                                     | 4         | <1%           |
| <b>V VARIOUS</b>                                                  | <b>4</b>  | <b>&lt;1%</b> |
| V03 All Other therapeutic products                                | 4         | <1%           |
| V03A All Other therapeutic products                               | 4         | <1%           |
| V03AE Drugs for treatment of hyperkalaemia and hyperphosphataemia | 4         | <1%           |
| V03AE01 Polystyrene sulfonate                                     | 4         | <1%           |
| <b>ANY HERBAL PREPARATION</b>                                     | <b>10</b> | <b>&lt;1%</b> |

**SDC 6.** Reason for admission, according to ICD-10 classification (n=1951 admissions).

| ICD-10 Chapter / Code block                                                                                   | Count      | Proportion  |
|---------------------------------------------------------------------------------------------------------------|------------|-------------|
| <b>ADVERSE DRUG REACTIONS</b>                                                                                 | <b>164</b> | <b>8.4%</b> |
| (various codes) Adverse drug reactions                                                                        | 164        | 8.4%        |
| <b>CERTAIN INFECTIOUS AND PARASITIC DISEASES</b>                                                              | <b>285</b> | <b>15%</b>  |
| A00-A09 Intestinal infectious diseases                                                                        | 49         | 2.5%        |
| A15-A19 Tuberculosis                                                                                          | 155        | 7.9%        |
| A30-A49 Other bacterial diseases                                                                              | 16         | <1%         |
| A50-A64 Infections with a predominantly sexual mode of transmission                                           | 2          | <1%         |
| A80-A89 Viral infections of the central nervous system                                                        | 6          | <1%         |
| B00-B09 Viral infections characterized by skin and mucous membrane lesions                                    | 1          | <1%         |
| B15-B19 Viral hepatitis                                                                                       | 5          | <1%         |
| B20-B24 Human immunodeficiency virus [HIV] disease                                                            | 12         | <1%         |
| B35-B49 Mycoses                                                                                               | 30         | 1.5%        |
| B50-B64 Protozoal diseases                                                                                    | 8          | <1%         |
| B65-B83 Helminthiases                                                                                         | 1          | <1%         |
| <b>NEOPLASMS</b>                                                                                              | <b>53</b>  | <b>2.7%</b> |
| C15-C26 Malignant neoplasms of digestive organs                                                               | 8          | <1%         |
| C30-C39 Malignant neoplasms of respiratory and intrathoracic organs                                           | 19         | <1%         |
| C45-C49 Malignant neoplasms of mesothelial and soft tissue                                                    | 2          | <1%         |
| C50-C50 Malignant neoplasm of breast                                                                          | 1          | <1%         |
| C69-C72 Malignant neoplasms of eye, brain and other parts of the central nervous system                       | 2          | <1%         |
| C73-C75 Malignant neoplasms of thyroid and other endocrine glands                                             | 1          | <1%         |
| C76-C80 Malignant neoplasms of ill-defined, secondary and unspecified sites                                   | 14         | <1%         |
| C81-C96 Malignant neoplasms, stated or presumed to be primary, of lymphoid, haematopoietic and related tissue | 4          | <1%         |
| D00-D09 In situ neoplasms                                                                                     | 1          | <1%         |
| D10-D36 Benign neoplasms                                                                                      | 1          | <1%         |
| <b>DISEASES OF THE BLOOD AND BLOOD-FORMING ORGANS; CERTAIN DISORDERS INVOLVING THE IMMUNE MECHANISM</b>       | <b>35</b>  | <b>1.8%</b> |
| D50-D53 Nutritional anaemias                                                                                  | 6          | <1%         |
| D55-D59 Haemolytic anaemias                                                                                   | 2          | <1%         |
| D60-D64 Aplastic and other anaemias                                                                           | 18         | <1%         |
| D65-D69 Coagulation defects, purpura and other haemorrhagic conditions                                        | 7          | <1%         |
| D70-D77 Other diseases of blood and blood-forming organs                                                      | 1          | <1%         |
| D80-D89 Certain disorders involving the immune mechanism                                                      | 1          | <1%         |
| <b>ENDOCRINE, NUTRITIONAL AND METABOLIC DISEASES</b>                                                          | <b>87</b>  | <b>4.5%</b> |
| E00-E07 Disorders of thyroid gland                                                                            | 1          | <1%         |
| E10-E14 Diabetes mellitus                                                                                     | 62         | 3.2%        |
| E15-E16 Other disorders of glucose regulation                                                                 | 4          | <1%         |
| E70-E90 Metabolic disorders                                                                                   | 20         | 1.0%        |
| <b>MENTAL AND BEHAVIOURAL DISORDERS</b>                                                                       | <b>106</b> | <b>5.4%</b> |
| F00-F09 Organic, including symptomatic, mental disorders                                                      | 26         | 1.3%        |
| F10-F19 Mental and behavioural disorders due to psychoactive substance use                                    | 25         | 1.3%        |
| F20-F29 Schizophrenia, schizotypal and delusional disorders                                                   | 41         | 2.1%        |
| F30-F39 Mood [affective] disorders                                                                            | 5          | <1%         |
| F40-F48 Neurotic, stress-related and somatoform disorders                                                     | 9          | <1%         |
| <b>DISEASES OF THE NERVOUS SYSTEM</b>                                                                         | <b>115</b> | <b>5.9%</b> |
| G00-G09 Inflammatory diseases of the central nervous system                                                   | 19         | <1%         |
| G10-G14 Systemic atrophies primarily affecting the central nervous system                                     | 1          | <1%         |
| G20-G26 Extrapyramidal and movement disorders                                                                 | 1          | <1%         |
| G35-G37 Demyelinating diseases of the central nervous system                                                  | 2          | <1%         |
| G40-G47 Episodic and paroxysmal disorders                                                                     | 68         | 3.5%        |
| G50-G59 Nerve, nerve root and plexus disorders                                                                | 1          | <1%         |
| G60-G64 Polyneuropathies and other disorders of the peripheral nervous system                                 | 3          | <1%         |
| G80-G83 Cerebral palsy and other paralytic syndromes                                                          | 14         | <1%         |
| G90-G99 Other disorders of the nervous system                                                                 | 6          | <1%         |

**Mouton JP, Njuguna C, Kramer N, Stewart A, Mehta U, Blockman M, et al.**  
**Adverse drug reactions causing admission to medical wards: a cross-sectional survey at four hospitals in South Africa.**  
**Supplemental Digital Content**

|                                                                                                |            |               |
|------------------------------------------------------------------------------------------------|------------|---------------|
| <b>DISEASES OF THE EYE AND ADNEXA</b>                                                          | <b>3</b>   | <b>&lt;1%</b> |
| H40-H42 Glaucoma                                                                               | 1          | <1%           |
| H46-H48 Disorders of optic nerve and visual pathways                                           | 1          | <1%           |
| H53-H54 Visual disturbances and blindness                                                      | 1          | <1%           |
| <b>DISEASES OF THE EAR AND MASTOID PROCESS</b>                                                 | <b>1</b>   | <b>&lt;1%</b> |
| H65-H75 Diseases of middle ear and mastoid                                                     | 1          | <1%           |
| <b>DISEASES OF THE CIRCULATORY SYSTEM</b>                                                      | <b>496</b> | <b>25%</b>    |
| I05-I09 Chronic rheumatic heart diseases                                                       | 2          | <1%           |
| I10-I15 Hypertensive diseases                                                                  | 30         | 1.5%          |
| I20-I25 Ischaemic heart diseases                                                               | 91         | 4.7%          |
| I26-I28 Pulmonary heart disease and diseases of the pulmonary circulation                      | 31         | 1.6%          |
| I30-I52 Other forms of heart disease                                                           | 151        | 7.7%          |
| I60-I69 Cerebrovascular diseases                                                               | 152        | 7.8%          |
| I70-I79 Diseases of arteries, arterioles and capillaries                                       | 2          | <1%           |
| I80-H89 Diseases of veins, lymphatic vessels and lymph nodes                                   | 36         | 1.9%          |
| I95-I99 Other and unspecified disorders of the cardiovascular system                           | 1          | <1%           |
| <b>DISEASES OF THE RESPIRATORY SYSTEM</b>                                                      | <b>313</b> | <b>16%</b>    |
| J00-J06 Acute upper respiratory infections                                                     | 3          | <1%           |
| J09-J18 Influenza and pneumonia                                                                | 117        | 6.0%          |
| J20-J22 Other acute lower respiratory infections                                               | 40         | 2.1%          |
| J40-J47 Chronic lower respiratory diseases                                                     | 98         | 5.0%          |
| J60-J70 Lung diseases due to external agents                                                   | 2          | <1%           |
| J80-J84 Other respiratory diseases principally affecting the interstitium                      | 23         | 1.2%          |
| J85-J86 Suppurative and necrotic conditions of the lower respiratory tract                     | 6          | <1%           |
| J90-J94 Other diseases of pleura                                                               | 18         | <1%           |
| J95-J99 Other diseases of the respiratory system                                               | 6          | <1%           |
| <b>DISEASES OF THE DIGESTIVE SYSTEM</b>                                                        | <b>39</b>  | <b>2.0%</b>   |
| K00-K14 Diseases of oral cavity, salivary glands and jaws                                      | 1          | <1%           |
| K20-K31 Diseases of oesophagus, stomach and duodenum                                           | 6          | <1%           |
| K55-K64 Other diseases of intestines                                                           | 9          | <1%           |
| K65-K67 Diseases of peritoneum                                                                 | 4          | <1%           |
| K70-K77 Diseases of liver                                                                      | 13         | <1%           |
| K80-K87 Disorders of gallbladder, biliary tract and pancreas                                   | 2          | <1%           |
| K90-K93 Other diseases of the digestive                                                        | 4          | <1%           |
| <b>DISEASES OF THE SKIN AND SUBCUTANEOUS TISSUE</b>                                            | <b>7</b>   | <b>&lt;1%</b> |
| L00-L08 Infections of the skin and subcutaneous tissue                                         | 5          | <1%           |
| L10-L14 Bullous disorders                                                                      | 1          | <1%           |
| L80-L99 Other disorders of the skin and subcutaneous tissue                                    | 1          | <1%           |
| <b>DISEASES OF THE MUSCULOSKELETAL SYSTEM AND CONNECTIVE TISSUE</b>                            | <b>10</b>  | <b>&lt;1%</b> |
| M15-M19 Arthropathies: Arthrosis                                                               | 1          | <1%           |
| M20-M25 Arthropathies: Other joint disorders                                                   | 1          | <1%           |
| M30-M36 Systemic connective tissue disorders                                                   | 3          | <1%           |
| M50-M54 Dorsopathies: Other dorsopathy                                                         | 2          | <1%           |
| M70-M79 Soft tissue disorders: Other soft tissue disorders                                     | 2          | <1%           |
| M91-M94 Osteopathies and chondropathies: chondropathies                                        | 1          | <1%           |
| <b>DISEASES OF THE GENITOURINARY SYSTEM</b>                                                    | <b>61</b>  | <b>3.1%</b>   |
| N00-N08 Glomerular diseases                                                                    | 7          | <1%           |
| N10-N16 Renal tubulo-interstitial diseases                                                     | 4          | <1%           |
| N17-N19 Renal failure                                                                          | 30         | 1.5%          |
| N20-N23 Urolithiasis                                                                           | 1          | <1%           |
| N30-N39 Other diseases of urinary system                                                       | 19         | <1%           |
| <b>PREGNANCY, CHILDBIRTH AND THE PUERPERIUM</b>                                                | <b>2</b>   | <b>&lt;1%</b> |
| O00-O08 Pregnancy with abortive outcome                                                        | 1          | <1%           |
| O10-O16 Oedema, proteinuria and hypertensive disorders in pregnancy, childbirth and puerperium | 1          | <1%           |
| <b>CONGENITAL MALFORMATIONS, DEFORMATIONS AND CHROMOSOMAL ABNORMALITIES</b>                    | <b>3</b>   | <b>&lt;1%</b> |
| Q20-Q28 Congenital malformations of the circulatory system                                     | 2          | <1%           |
| Q60-Q64 Congenital malformations of the urinary system                                         | 1          | <1%           |

**Mouton JP, Njuguna C, Kramer N, Stewart A, Mehta U, Blockman M, et al.**  
**Adverse drug reactions causing admission to medical wards: a cross-sectional survey at four hospitals in South Africa.**  
**Supplemental Digital Content**

|                                                                                            |             |               |
|--------------------------------------------------------------------------------------------|-------------|---------------|
| <b>SYMPTOMS, SIGNS AND ABNORMAL CLINICAL AND LABORATORY FINDINGS</b>                       | <b>94</b>   | <b>4.8%</b>   |
| R00-R09 Symptoms and signs involving the circulatory and respiratory systems               | 18          | <1%           |
| R10-R19 Symptoms and signs involving the digestive system and abdomen                      | 13          | <1%           |
| R40-R46 Symptoms and signs involving cognition, perception, emotional state and behaviour  | 16          | <1%           |
| R50-R69 General symptoms and signs                                                         | 39          | 2.0%          |
| R70-R79 Abnormal findings on examination of blood, without diagnosis                       | 2           | <1%           |
| R90-R94 Abnormal findings on diagnostic imaging and on function studies, without diagnosis | 6           | <1%           |
| <b>INJURY, POISONING AND CERTAIN OTHER CONSEQUENCES OF EXTERNAL CAUSES</b>                 | <b>5</b>    | <b>&lt;1%</b> |
| S00-S09 Injuries to the head                                                               | 1           | <1%           |
| S70-S79 Injuries to the hip and thigh                                                      | 2           | <1%           |
| T80-T88 Complications of surgical and medical care                                         | 2           | <1%           |
| <b>EXTERNAL CAUSES OF MORBIDITY AND MORTALITY</b>                                          | <b>65</b>   | <b>3.3%</b>   |
| X40-X49 Accidents: Other external causes                                                   | 1           | <1%           |
| X60-X84 Intentional self-harm                                                              | 64          | 3.3%          |
| <b>FACTORS INFLUENCING HEALTH STATUS AND CONTACT WITH HEALTH SERVICES</b>                  | <b>7</b>    | <b>&lt;1%</b> |
| Z00-Z13 Persons encountering health services for examination and investigation             | 1           | <1%           |
| Z40-Z54 Persons encountering health services for specific procedures and health care       | 4           | <1%           |
| Z70-Z76 Persons encountering health services in other circumstances                        | 2           | <1%           |
| <b>TOTAL</b>                                                                               | <b>1951</b> | <b>100%</b>   |

**Mouton JP, Njuguna C, Kramer N, Stewart A, Mehta U, Blockman M, et al.**  
**Adverse drug reactions causing admission to medical wards: a cross-sectional survey at four hospitals in South Africa.**  
**Supplemental Digital Content**

**SDC 7.** Summary of presentation of patients admitted for drug-induced renal impairment.

| Case | Age, sex | HIV (CD4) | Presentation                                                                                                                                           | Implicated drugs (duration of exposure)                                                                | Causality | Preventable |
|------|----------|-----------|--------------------------------------------------------------------------------------------------------------------------------------------------------|--------------------------------------------------------------------------------------------------------|-----------|-------------|
| 1†   | 40 M     | Pos (70)  | Creat = 1026, K = 6.8; baseline creat = 145 (3m ago). Urinary tract infection.                                                                         | Tenofovir (unk)                                                                                        | Possible  | Yes         |
| 2    | 56 F     | Neg       | Creat = 360, K = 4.0; no baseline available. Hypertension and previous CVA.                                                                            | Spironolactone (>3w), enalapril (>3w), and furosemide (>3w)                                            | Possible  | Yes         |
| 3†   | 25 M     | Pos (297) | Creat = 139, K = 5.5 and hypocalcaemia; baseline creat = 65 (2m ago). Kaposi sarcoma, pulmonary TB and chronic gastroenteritis.                        | Tenofovir (3m)                                                                                         | Possible  | Yes         |
| 4    | 41 F     | Pos (416) | Creat = 268, K = 3.2 and proteinuria; baseline creat = 67 (4m ago). Biopsy: mild HIVAN, central sclerosing variant. Pulmonary TB.                      | Tenofovir (4m)                                                                                         | Possible  | Yes         |
| 5†   | 49 M     | Unk       | Creat = 1038, K = 6.7; baseline not recorded, but known with chronic kidney disease, hypertension and diabetes.                                        | Acetylsalicylic acid (unk), furosemide (unk), perindopril and HCTZ (unk), and valsartan (unk)          | Possible  | Yes         |
| 6†   | 30 M     | Pos (unk) | Creat = 647, K = 5.0; no baseline available. Gastroenteritis, dehydration, lower respiratory tract infection                                           | Tenofovir (2m or more)                                                                                 | Possible  | No          |
| 7    | 42 M     | Neg       | Creat = 614, K = 4.5 and proteinuria. Biopsy: diabetic nodular glomerulosclerosis.                                                                     | Enalapril (3d)                                                                                         | Probable  | No          |
| 8    | 22 F     | Pos (140) | Creat = 1337, K = 7.3 and proteinuria; baseline creat = 39 (3w ago). Suspected sepsis (raised inflammatory markers).                                   | Tenofovir (3w)                                                                                         | Possible  | No          |
| 9†   | 36 M     | Pos (84)  | Creat = 2300, K = 8.9 and proteinuria; baseline creat = 818 (5w ago). Chronic kidney disease previously attributed to HIVAN.                           | Captopril (4w), furosemide (2.5w), and HCTZ (2w)                                                       | Probable  | Yes         |
| 10   | 32 M     | Pos (31)  | Creat = 303, K = 4.1 and proteinuria; baseline creat = 63 (3m ago). Pulmonary TB and chronic gastroenteritis.                                          | Tenofovir (2m)                                                                                         | Possible  | No          |
| 11†  | 65 F     | Unk       | Creat = 1541, K = 4.5; baseline creat = 350 (14m ago). Hypertension, diabetes, previous CVA, cardiac failure, gastroenteritis.                         | Enalapril (>1y)                                                                                        | Possible  | Yes         |
| 12   | 56 F     | Unk       | Creat = 360, K = 4.0; no baseline available. Gastroenteritis and dehydration.                                                                          | Amlodipine (>5y), atenolol (>5y), enalapril (>5y), furosemide (>2y), HCTZ (>5y), and hydralazine (>2y) | Possible  | No          |
| 13   | 34 F     | Pos (137) | Creat = 171, K = 2.2, phosphate low, chloride high, normal anion gap, acidosis; baseline creat = 68 (4m ago). TB meningitis.                           | Tenofovir (unk)                                                                                        | Possible  | Yes         |
| 14†  | 43 F     | Pos (103) | Creat = 1356, K = 5.2; no baseline available. Chronic gastroenteritis, dehydration.                                                                    | Tenofovir (3m)                                                                                         | Possible  | No          |
| 15   | 48 M     | Unk       | Creat = 807, K = 6.7 and proteinuria; baseline creat = 179 (18m ago). Type 2 diabetes, chronic kidney disease, gastroenteritis.                        | Spironolactone (unk), enalapril (unk), and furosemide (unk)                                            | Possible  | Yes         |
| 16   | 69 M     | Neg       | Creat = 1249, K = 5.7 and proteinuria; baseline creat = 72 (1m ago). Biopsy: acute tubular necrosis on background mild diabetic changes. Pulmonary TB. | Rifampicin (4w)                                                                                        | Possible  | No          |
|      |          |           |                                                                                                                                                        | Enalapril (unk)                                                                                        | Possible  | No          |
| 17†  | 31 F     | Pos (700) | Creat = 822, K = 4.6; no baseline available. Epilepsy, schizophrenia, urinary tract infection.                                                         | Co-amoxiclav (5d)                                                                                      | Possible  | No          |
|      |          |           |                                                                                                                                                        | Ibuprofen (5d)                                                                                         | Possible  | No          |
| 18   | 28 F     | Pos (218) | Creat = 605, K = 2.8; baseline creat = 112 (10d ago). Pulmonary TB.                                                                                    | Co-trimoxazole (unk)                                                                                   | Possible  | No          |
|      |          |           |                                                                                                                                                        | Tenofovir (for 2w, stopped 1m ago)                                                                     | Possible  | Yes         |
| 19†  | 34 M     | Pos (167) | Creat = 712, K = 6.7; baseline creat = 69 (11m ago). Kaposi sarcoma, vomiting.                                                                         | Aciclovir (for 1w, 3w ago)                                                                             | Possible  | No          |
|      |          |           |                                                                                                                                                        | Co-amoxiclav (for 1w, 3w ago)                                                                          | Possible  | No          |
|      |          |           |                                                                                                                                                        | Indometacin (for 1w, 3w ago)                                                                           | Possible  | No          |
|      |          |           |                                                                                                                                                        | Tenofovir (unk)                                                                                        | Possible  | No          |



**Mouton JP, Njuguna C, Kramer N, Stewart A, Mehta U, Blockman M, et al.**  
**Adverse drug reactions causing admission to medical wards: a cross-sectional survey at four hospitals in South Africa.**  
**Supplemental Digital Content**

| Case | Age, sex | HIV (CD4) | Presentation                                                                                                                             | Implicated drugs (duration of exposure)                                                | Causality | Preventable |
|------|----------|-----------|------------------------------------------------------------------------------------------------------------------------------------------|----------------------------------------------------------------------------------------|-----------|-------------|
| 20†  | 43 F     | Pos (46)  | Creat = 1552, K = 8.3; baseline creat = 52 (10w ago). Recurrent <i>H. influenzae</i> pneumonia, diarrhoea and vomiting.                  | Co-trimoxazole (unk)                                                                   | Possible  | No          |
|      |          |           |                                                                                                                                          | Tenofovir (unk)                                                                        | Possible  | No          |
| 21†* | 33 F     | Pos (37)  | Hepatorenal failure (mixed LI and AKI). Creat = 608, K = 5.6; baseline creat = 51 (1m ago). Pulmonary TB. Severe hypertension, CVA.      | Rifampicin (5d)                                                                        | Probable  | No          |
| 22*  | 50 M     | Pos (165) | Hepatorenal failure (cholestatic LI and AKI). Creat = 1133, K = 6.1; baseline creat = 75 (6m ago).                                       | Enalapril (unk)<br>(Could not exclude a potential role played by traditional remedies) | Possible  | No          |
| 23†* | 44 M     | Pos (unk) | Hepatorenal failure (hepatocellular LI and AKI). Creat = 259, K = 6.5; baseline creat = 112 (10d ago). Depressed level of consciousness. | Co-trimoxazole (unk)                                                                   | Possible  | Yes         |
| 24*  | 34 M     | Pos (208) | Hepatorenal failure (cholestatic LI and AKI). Creat = 907, K = 4.0; baseline creat = 81 (5m ago).                                        | Co-trimoxazole (unk)                                                                   | Probable  | No          |

\* Case also included in Supplementary Table S7

† Patient died (from any cause) during admission or 30-day follow-up period

AKI: acute kidney injury; CD4: CD4-cell count (cells /  $\mu$ L); Creat: serum- creatinine concentration ( $\mu$ mol/L); CVA: cerebrovascular accident; d/w/m/y: duration in days / weeks / months / years; F: female; HCTZ: hydrochlorothiazide; HIVAN: HIV-associated nephropathy; K: serum potassium concentration (mmol/L); LI: liver injury; M: male; neg: HIV-seronegative; pos: HIV-seropositive; TB: tuberculosis; unk: unknown

**SDC 8.** Summary of presentation of patients admitted for drug-induced hypoglycaemia.

| Case | Age, sex | HIV | BG  | Renal impairment | Relevant co-morbidities                                      | Implicated drugs (duration of exposure)               | Causality | Preventable |
|------|----------|-----|-----|------------------|--------------------------------------------------------------|-------------------------------------------------------|-----------|-------------|
| 25   | 54 F     | Neg | 1.4 | Yes: Creat=400   |                                                              | Gliclazide (unk) & metformin (unk)                    | Certain   | Yes         |
| 26   | 74 F     | Unk | 2   | Yes: eGFR=32     | ?Nosocomial sepsis (WCC=10)                                  | Insulin (>10y)                                        | Certain   | Yes         |
| 27   | 79 F     | Unk | 2.1 | No               |                                                              | Gliclazide (3d) & metformin (>6m)                     | Certain   | Yes         |
| 28   | 77 F     | Unk | 1.2 | Yes: eGFR=40     | Dementia                                                     | Gliclazide (unk)                                      | Certain   | Yes         |
| 29   | 56 F     | Unk | 2.2 | Yes: Creat=200   |                                                              | Insulin (unk), gliclazide (unk) & metformin (unk)     | Certain   | Yes         |
| 30   | 52 F     | Neg | 1.2 | Yes: Creat=190   | WCC=23                                                       | Insulin (unk)                                         | Certain   | Yes         |
| 31   | 68 F     | Unk | 1.9 | Yes: Creat=233   |                                                              | Glibenclamide (unk) & metformin (unk)                 | Certain   | Yes         |
| 32   | 60 F     | Unk | 2.2 | No               |                                                              | Glibenclamide (unk) & metformin (unk)                 | Certain   | Yes         |
| 33   | 77 M     | Unk | 2.8 | Yes: Creat=103   | ?UTI (CRP=37)<br>Dementia                                    | Insulin (unk), gliclazide (unk) & metformin (unk)     | Certain   | Yes         |
| 34†  | 74 F     | Unk | 1.7 | Yes: Creat=131   | Old CVA, repeat CVA, WCC=10, CRP=24                          | Insulin (unk) & metformin (unk)                       | Certain   | No          |
| 35   | 56 F     | Unk | NR  | Yes: Creat=88    | Gastroenteritis, pneumonia                                   | Gliclazide (unk) & metformin (unk)                    | Certain   | Yes         |
| 36   | 70 F     | Unk | NR  | Yes: Creat=97    |                                                              | Insulin (>6m)                                         | Certain   | Yes         |
| 37   | 55 M     | Unk | NR  | No               | Pneumonia (WCC=13, CRP<5)<br>Skipped a meal but used insulin | Insulin (unk), glibenclamide (unk) & metformin (unk)  | Certain   | Yes         |
| 38†  | 53 M     | Unk | 0.7 | Yes: eGFR=25     |                                                              | Insulin (1w)                                          | Certain   | Yes         |
| 39   | 56 M     | Unk | 1.8 | Yes: eGFR=6      | WCC=17                                                       | Glibenclamide (1m)                                    | Probable  | Yes         |
| 40†  | 73 F     | Unk | 0.5 | Yes: eGFR=31     | Sepsis (fever, WCC=14, neutrophilia)                         | Insulin (>2y)                                         | Probable  | No          |
| 41   | 56 F     | Unk | 0.7 | No               |                                                              | Insulin (unk)                                         | Certain   | No          |
| 42†  | 61 F     | Unk | 1.1 | Yes: Creat=700   | New CVA                                                      | Insulin (unk) & unspecified oral hypoglycaemic agents | Certain   | No          |
| 43   | 60 M     | Unk | 2.1 | Yes: eGFR=18     |                                                              | Insulin (unk)                                         | Certain   | Yes         |
| 44   | 60 F     | Unk | 2   | Yes: eGFR=45     | WCC=9, CRP=36                                                | Insulin (>2y)                                         | Certain   | Yes         |
| 45   | 78 M     | Neg | 1.8 | Yes: eGFR=53     | Bedsore (WCC=10, CRP=63)                                     | Gliclazide (2m) & metformin (2m)                      | Probable  | No          |
| 46   | 63 M     | Pos | 1.3 | Yes: eGFR=48     |                                                              | Insulin (unk)                                         | Certain   | Yes         |

†Patient died (from any cause) during admission or 30-day follow-up period

BG: blood glucose nadir as recorded in file (mmol/L); Creat: creatinine (µmol/L); CRP: C-reactive protein (mg/L); CVA: cerebrovascular accident; d/w/m/y: duration in days/ weeks/ months/ years; eGFR: estimated glomerular filtration rate (as per laboratory report) (mL/min/1.73 m<sup>2</sup>); F: female; M: male; neg: HIV-seronegative; NR: not recorded; pos: HIV-seropositive; unk: unknown; UTI: urinary tract infection; WCC: white blood cell count (x10<sup>9</sup>/L)

*Mouton JP, Njuguna C, Kramer N, Stewart A, Mehta U, Blockman M, et al.*  
**Adverse drug reactions causing admission to medical wards: a cross-sectional survey at four hospitals in South Africa.**  
**Supplemental Digital Content**

**SDC 9.** Summary of presentation of patients admitted for drug-induced liver injury.

| Case | Age, sex | HIV (CD4) | DILI classification at first presentation (t-bili:ALT:ALP) | Hepatic co-morbidity                                                             | Implicated drugs (duration of exposure) | Causality | Preventable |
|------|----------|-----------|------------------------------------------------------------|----------------------------------------------------------------------------------|-----------------------------------------|-----------|-------------|
| 47   | 36 M     | Pos (2)   | Cholestatic liver injury (71:30:305)                       |                                                                                  | Rifampicin (>4m)                        | Possible  | No          |
| 48   | 57 F     | Unk       | Cholestatic liver injury (74:13:146)                       | Alcohol liver disease, portal hypertension and oesophageal varices. Hepatitis C. | Rifampicin (<3w)                        | Possible  | No          |
| 49†  | 58 F     | Pos (299) | Cholestatic liver injury (309:71:359)                      |                                                                                  | Rifampicin (4m)                         | Possible  | No          |
| 50†  | 36 F     | Pos (unk) | Cholestatic liver injury (146:205:468)                     |                                                                                  | Efavirenz (unk)                         | Possible  | No          |
| 51†  | 34 M     | Pos (599) | Cholestatic liver injury (118:93:134)                      | Abdominal MDR-TB but no bile duct obstruction                                    | Rifampicin (2m)                         | Probable  | No          |
| 52   | 34 M     | Pos (54)  | Cholestatic liver injury (53:47:169)                       |                                                                                  | Rifampicin (2d)                         | Possible  | No          |
| 53   | 19 F     | Pos (44)  | Cholestatic liver injury (114:63:153)                      | Suspected IRIS                                                                   | Rifampicin (3w)                         | Possible  | No          |
|      |          |           |                                                            |                                                                                  | Co-trimoxazole (3w)                     | Possible  | No          |
| 54†  | 29 F     | Pos (85)  | Cholestatic liver injury (157:63:223)                      |                                                                                  | Rifampicin (2w)                         | Possible  | No          |
| 55   | 38 F     | Pos (100) | Cholestatic liver injury (16:355:973)                      |                                                                                  | Efavirenz (unk)                         | Probable  | No          |
| 56   | 20 F     | Pos (36)  | Cholestatic liver injury (87:76:438)                       |                                                                                  | Rifampicin (6w)                         | Possible  | No          |
| 57   | 19 M     | Neg       | Hepatocellular injury (35:968:88)                          |                                                                                  | Rifampicin (6w)                         | Possible  | No          |
|      |          |           |                                                            |                                                                                  | Isoniazid (6w)                          | Possible  | No          |
|      |          |           |                                                            |                                                                                  | Pyrazinamide (6w)                       | Possible  | No          |
| 58   | 47 F     | Pos (342) | Hepatocellular injury (16:2237:356)                        |                                                                                  | Erythromycin (course commenced 2w ago)  | Possible  | No          |
|      |          |           |                                                            |                                                                                  | Nevirapine (unk)                        | Possible  | No          |
| 59†  | 37 F     | Pos (178) | Hepatocellular injury (164:1512:140)                       | Chronic Hepatitis B                                                              | Rifampicin (4m)                         | Possible  | No          |
|      |          |           |                                                            |                                                                                  | Isoniazid (4m)                          | Possible  | No          |
|      |          |           |                                                            |                                                                                  | Pyrazinamide (4m)                       | Possible  | Yes         |

**Mouton JP, Njuguna C, Kramer N, Stewart A, Mehta U, Blockman M, et al.**  
**Adverse drug reactions causing admission to medical wards: a cross-sectional survey at four hospitals in South Africa.**  
**Supplemental Digital Content**

| Case | Age, sex | HIV (CD4) | DILI classification at first presentation (t-bili:ALT:ALP)   | Hepatic co-morbidity                                              | Implicated drugs (duration of exposure)                                                | Causality | Preventable |
|------|----------|-----------|--------------------------------------------------------------|-------------------------------------------------------------------|----------------------------------------------------------------------------------------|-----------|-------------|
| 60   | 30 M     | Pos (33)  | Hepatocellular injury (92:960:448)                           |                                                                   | Rifampicin (?5m)                                                                       | Possible  | No          |
|      |          |           |                                                              |                                                                   | Efavirenz (?1y)                                                                        | Possible  | No          |
|      |          |           |                                                              |                                                                   | Isoniazid (?5m)                                                                        | Possible  | No          |
|      |          |           |                                                              |                                                                   | Pyrazinamide (?5m)                                                                     | Possible  | No          |
| 61   | 39 F     | Pos (130) | Hepatocellular injury (unk:825:218)                          | Previous DILI. This admission for repeat DILI during rechallenge. | Rifampicin (2w)                                                                        | Possible  | Yes         |
|      |          |           |                                                              |                                                                   | Isoniazid (2w)                                                                         | Possible  | Yes         |
| 62   | 22 F     | Pos (545) | Mixed liver injury (94:143:146)                              | Liver biopsy supports DILI                                        | Efavirenz (6m)                                                                         | Possible  | No          |
| 21†* | 33 F     | Pos (37)  | Hepatorenal failure (mixed LI and AKI) (58:225:204)          |                                                                   | Rifampicin (5d)                                                                        | Probable  | No          |
| 22*  | 50 M     | Pos (165) | Hepatorenal failure (cholestatic LI and AKI) (191:13:153)    |                                                                   | Enalapril (unk)<br>(Could not exclude a potential role played by traditional remedies) | Possible  | No          |
| 23†* | 44 M     | Pos (unk) | Hepatorenal failure (hepatocellular LI and AKI) (73:558:124) | Chronic Hepatitis B                                               | Co-trimoxazole (unk)                                                                   | Possible  | Yes         |
| 24*  | 34 M     | Pos (208) | Hepatorenal failure (cholestatic LI and AKI) (174:25:110)    |                                                                   | Co-trimoxazole (unk)                                                                   | Probable  | No          |

\* Case also included in Supplementary Table S5

† Patient died (from any cause) during admission or 30-day follow-up period

AKI: acute kidney injury; ALP: alkaline phosphatase (IU/L); ALT: alanine transaminase (IU/L); CD4: CD4-cell count (cells /  $\mu$ L); d/w/m/y: duration in days/ weeks/ months/ years; DILI: drug-induced liver injury; F: female; IRIS: immune reconstitution inflammatory syndrome; LI: liver injury; M: male; MDR-TB: multidrug-resistant tuberculosis; neg: HIV-seronegative; pos: HIV-seropositive; t-bili: total serum-bilirubin ( $\mu$ mol/L); unk: unknown.

*Mouton JP, Njuguna C, Kramer N, Stewart A, Mehta U, Blockman M, et al.*  
*Adverse drug reactions causing admission to medical wards: a cross-sectional survey at four hospitals in South Africa.*  
**Supplemental Digital Content**

**SDC 10.** Summary of presentation of patients admitted for drug-induced haemorrhage.

| Case | Age, sex | HIV | Haemorrhage                        | Implicated drugs     | Indication for warfarin                                          | Causality | Preventable |
|------|----------|-----|------------------------------------|----------------------|------------------------------------------------------------------|-----------|-------------|
| 63   | 70 F     | Unk | Gingival bleeding                  | Warfarin (INR > 10)  | DVT                                                              | Certain   | Yes         |
| 64   | 56 F     | Unk | Gastric haemorrhage                | Warfarin (INR = 4.8) | Valve replacement                                                | Certain   | Yes         |
| 65   | 61 F     | Unk | Gastric haemorrhage                | Diclofenac           |                                                                  | Probable  | No          |
| 66   | 90 F     | Unk | Gastrointestinal haemorrhage       | Acetylsalicylic acid |                                                                  | Possible  | No          |
| 67   | 79 F     | Unk | Gastrointestinal haemorrhage       | NSAIDs, unspecified  |                                                                  | Possible  | No          |
| 68   | 83 M     | Unk | Gastritis haemorrhagic             | Acetylsalicylic acid |                                                                  | Possible  | No          |
| 69   | 62 F     | Unk | Lower gastrointestinal haemorrhage | Warfarin (INR = 4.7) | Valvular disease                                                 | Probable  | No          |
| 70   | 58 F     | Unk | Haemoptysis                        | Warfarin (INR = 4.9) | Valve replacement                                                | Probable  | Yes         |
| 71   | 18 F     | Pos | Haemoptysis                        | Warfarin (INR > 10)  | Right ventricular thrombosis secondary to dilated cardiomyopathy | Certain   | Yes         |
| 72   | 72 F     | Unk | Haemoptysis                        | Warfarin (INR = 2.0) | Valvular disease                                                 | Possible  | No          |
| 73   | 53 F     | Neg | Epistaxis                          | NSAIDs, unspecified  |                                                                  | Possible  | No          |
| 74   | 77 F     | Unk | Haemarthrosis                      | Warfarin (INR = 4.3) | DVT                                                              | Certain   | Yes         |
| 75   | 87 F     | Unk | Haematuria                         | Warfarin (INR > 10)  | Atrial fibrillation                                              | Certain   | Yes         |
| 76   | 48 F     | Unk | Retroperitoneal haemorrhage        | Warfarin (INR = 1.5) | Valve replacement                                                | Probable  | Yes         |
| 77   | 40 F     | Unk | Menorrhagia                        | Warfarin (INR > 10)  | DVT                                                              | Certain   | Yes         |
| 78   | 30 F     | Pos | Menorrhagia                        | Warfarin (INR = 6.9) | DVT                                                              | Certain   | Yes         |
| 79†  | 79 F     | Unk | Cerebral haemorrhage               | Warfarin (INR = 4.6) | DVT                                                              | Certain   | Yes         |
| 80†  | 79 F     | Unk | Haemorrhage intracranial           | Warfarin (INR = 9.2) | Atrial fibrillation                                              | Probable  | Yes         |
| 81†  | 67 F     | Pos | Subarachnoid haemorrhage           | Acetylsalicylic acid |                                                                  | Possible  | No          |

† Patient died (from any cause) during admission or 30-day follow-up period

F: female; M: male; neg: HIV-seronegative; pos: HIV-seropositive; unk: unknown; INR: international normalised ratio; NSAIDs: non-steroidal antiinflammatories; DVT: deep venous thrombosis

*Mouton JP, Njuguna C, Kramer N, Stewart A, Mehta U, Blockman M, et al.*  
*Adverse drug reactions causing admission to medical wards: a cross-sectional survey at four hospitals in South Africa.*  
**Supplemental Digital Content**

**SDC 11.** Summary of presentation of patients admitted for drug-induced blood dyscrasias.

| Case | Age, sex | HIV (CD4) | Adverse drug reaction           | Implicated drugs             | Causality | Preventable |
|------|----------|-----------|---------------------------------|------------------------------|-----------|-------------|
| 82   | 48 M     | Pos (unk) | Anaemia                         | Zidovudine                   | Probable  | Yes         |
| 83   | 58 F     | Pos (338) | Anaemia                         | Zidovudine                   | Possible  | No          |
| 84   | 55 M     | Pos (206) | Anaemia macrocytic              | Zidovudine and lamivudine    | Probable  | Yes         |
| 85   | 33 F     | Pos (11)  | Anaemia normochromic normocytic | Zidovudine                   | Possible  | No          |
| 86†  | 29 F     | Pos (16)  | Aplastic anaemia                | Co-trimoxazole               | Certain   | Yes         |
| 87†  | 32 M     | Pos (78)  | Pancytopenia                    | Co-trimoxazole               | Possible  | No          |
| 88   | 33 F     | Pos (24)  | Thrombocytopenia                | Co-trimoxazole               | Possible  | No          |
| 89   | 65 M     | Pos (54)  | Thrombocytopenia                | Co-trimoxazole               | Possible  | No          |
| 90   | 23 M     | Neg       | Thrombocytopenia                | Rifampicin                   | Probable  | No          |
|      |          |           |                                 | Amoxicillin                  | Possible  | No          |
| 91   | 31 M     | Pos (207) | Thrombocytopenia                | Rifampicin                   | Possible  | No          |
|      |          |           |                                 | Isoniazid                    | Possible  | No          |
| 92   | 26 M     | Pos (622) | Thrombocytopenia                | Valproic acid                | Possible  | No          |
| 93†  | 60 M     | Pos (331) | Neutropenia                     | Stavudine                    | Possible  | No          |
| 94   | 63 F     | Unk       | Neutropenia                     | Allopurinol                  | Possible  | No          |
|      |          |           |                                 | Colchicine                   | Possible  | No          |
| 95   | 70 F     | Unk       | Leukopenia                      | Methotrexate and chloroquine | Certain   | No          |

† Patient died (from any cause) during admission or 30-day follow-up period

CD4: CD4-cell count (cells /  $\mu$ L); F: female; M: male; neg: HIV-seronegative; pos: HIV-seropositive; unk: unknown;

*Mouton JP, Njuguna C, Kramer N, Stewart A, Mehta U, Blockman M, et al.*  
*Adverse drug reactions causing admission to medical wards: a cross-sectional survey at four hospitals in South Africa.*  
**Supplemental Digital Content**

**SDC 12.** Summary of presentation of patients admitted for other\* Type A adverse drug reactions.

| Case | Age, sex | HIV | Adverse drug reaction       | Implicated drugs                                                                                    | Causality | Preventable |
|------|----------|-----|-----------------------------|-----------------------------------------------------------------------------------------------------|-----------|-------------|
| 96   | 22 F     | Neg | Cardiac failure             | Carvedilol                                                                                          | Possible  | No          |
| 97   | 67 F     | Unk | Cardiac failure             | Carvedilol                                                                                          | Possible  | Yes         |
| 98   | 79 M     | Unk | Cardiac failure             | Atenolol                                                                                            | Probable  | Yes         |
| 99   | 52 F     | Neg | Cardiac failure             | Propranolol                                                                                         | Probable  | No          |
| 100  | 72 F     | Unk | Cardiac failure             | Amlodipine and atenolol                                                                             | Possible  | Yes         |
| 101  | 55 F     | Unk | Cardiac failure             | Nifedipine                                                                                          | Possible  | No          |
| 102  | 84 F     | Unk | Cardiac failure             | Atenolol                                                                                            | Possible  | No          |
| 103  | 51 F     | Neg | Cardiac failure             | Atenolol and diltiazem                                                                              | Possible  | Yes         |
| 104  | 75 F     | Unk | Cardiac failure             | Atenolol                                                                                            | Possible  | No          |
| 105  | 83 F     | Unk | Hypotension                 | Enalapril and furosemide                                                                            | Possible  | No          |
| 106  | 55 M     | Unk | Hypotension                 | Carvedilol, enalapril, and furosemide                                                               | Probable  | Yes         |
| 107  | 53 M     | Unk | Hypotension                 | Enalapril and furosemide                                                                            | Possible  | No          |
| 108  | 88 F     | Unk | Orthostatic hypotension     | Amlodipine, enalapril, and hydrochlorothiazide                                                      | Possible  | Yes         |
| 109  | 75 F     | Unk | Syncope                     | Tramadol, clonazepam, furosemide, propranolol, phenytoin, and levodopa with decarboxylase inhibitor | Possible  | Yes         |
| 110  | 75 F     | Unk | Cerebrovascular accident    | Amlodipine, atenolol, enalapril, and hydrochlorothiazide                                            | Possible  | Yes         |
| 111  | 55 F     | Unk | Acute myocardial infarction | Tranexamic acid                                                                                     | Possible  | No          |
| 112  | 36 F     | Pos | Gastritis                   | Acetylsalicylic acid and paracetamol (combination formulation)                                      | Probable  | Yes         |
| 113  | 52 F     | Pos | Vomiting                    | Tenofovir-lamivudine-efavirenz (fixed drug combination)                                             | Possible  | No          |
| 114  | 45 F     | Neg | Vomiting                    | Metformin                                                                                           | Certain   | No          |
| 115† | 65 F     | Pos | Diarrhoea                   | Lopinavir-ritonavir                                                                                 | Possible  | No          |
| 116  | 65 F     | Unk | Pneumonia                   | Prednisone                                                                                          | Possible  | No          |
| 117† | 19 M     | Unk | Pneumonia                   | Tacrolimus and prednisone                                                                           | Possible  | No          |

**Mouton JP, Njuguna C, Kramer N, Stewart A, Mehta U, Blockman M, et al.**  
**Adverse drug reactions causing admission to medical wards: a cross-sectional survey at four hospitals in South Africa.**  
**Supplemental Digital Content**

| Case | Age, sex | HIV | Adverse drug reaction                   | Implicated drugs                       | Causality | Preventable |
|------|----------|-----|-----------------------------------------|----------------------------------------|-----------|-------------|
| 118  | 56 F     | Unk | Pneumonia                               | Imatinib                               | Possible  | No          |
| 119  | 57 F     | Neg | Pneumonia                               | Azathioprine and prednisone            | Possible  | No          |
| 120  | 18 M     | Unk | Gastroenteritis                         | Ciclosporin                            | Probable  | No          |
| 121† | 76 F     | Unk | Pyelonephritis acute                    | Chlorambucil and prednisone            | Possible  | No          |
| 122† | 27 F     | Pos | <i>Pneumocystis jirovecii</i> pneumonia | Prednisone                             | Possible  | No          |
| 123  | 50 M     | Unk | Diabetes mellitus                       | Prednisone                             | Possible  | No          |
| 124  | 64 F     | Unk | Diabetes mellitus                       | Hydrochlorothiazide and prednisone     | Probable  | Yes         |
| 125  | 69 F     | Unk | Hypokalaemia                            | Furosemide                             | Certain   | Yes         |
| 126† | 56 F     | Neg | Hypokalaemia                            | Hydrochlorothiazide                    | Possible  | Yes         |
| 127  | 69 F     | Unk | Hypokalaemia                            | Furosemide and prednisone              | Certain   | Yes         |
| 128  | 58 F     | Unk | Hyperkalaemia                           | Enalapril                              | Probable  | Yes         |
| 129  | 69 F     | Pos | Hyponatraemia                           | Co-trimoxazole and hydrochlorothiazide | Probable  | No          |
| 130  | 66 F     | Unk | Hyponatraemia                           | Hydrochlorothiazide                    | Possible  | No          |
| 131  | 47 F     | Unk | Hyponatraemia                           | Hydrochlorothiazide                    | Possible  | No          |
| 132† | 53 M     | Pos | Lactic acidosis                         | Stavudine                              | Possible  | Yes         |
| 133† | 61 F     | Pos | Lactic acidosis                         | Stavudine                              | Probable  | Yes         |
| 134  | 82 M     | Unk | Asthenia                                | Digoxin                                | Certain   | Yes         |
| 135  | 23 M     | Unk | Confusional state                       | Phenytoin                              | Certain   | Yes         |
| 136† | 82 F     | Unk | Confusional state                       | Tramadol                               | Possible  | No          |
| 137† | 89 F     | Unk | Confusional state                       | Digoxin                                | Certain   | Yes         |
| 138  | 43 F     | Pos | Confusional state                       | Efavirenz                              | Possible  | No          |
| 139  | 34 M     | Pos | Confusional state                       | Efavirenz                              | Probable  | No          |
| 140  | 62 F     | Unk | Confusional state                       | Phenytoin                              | Certain   | Yes         |
| 141  | 91 F     | Unk | Confusional state                       | Tramadol, risperidone, and zopiclone   | Probable  | Yes         |
| 142  | 40 M     | Unk | Confusional state                       | Phenobarbital and phenytoin            | Probable  | Yes         |



*Mouton JP, Njuguna C, Kramer N, Stewart A, Mehta U, Blockman M, et al.  
Adverse drug reactions causing admission to medical wards: a cross-sectional survey at four hospitals in South Africa.  
Supplemental Digital Content*

| Case | Age, sex | HIV | Adverse drug reaction            | Implicated drugs                                          | Causality | Preventable |
|------|----------|-----|----------------------------------|-----------------------------------------------------------|-----------|-------------|
| 143† | 39 F     | Pos | Ataxia                           | Efavirenz                                                 | Possible  | No          |
| 144  | 33 M     | Unk | Ataxia                           | Phenytoin                                                 | Certain   | Yes         |
| 145  | 36 M     | Unk | Ataxia                           | Phenytoin                                                 | Certain   | Yes         |
| 146  | 53 M     | Unk | Loss of consciousness            | Phenytoin                                                 | Probable  | Yes         |
| 147  | 58 F     | Unk | Generalised tonic-clonic seizure | Theophylline, chlorpromazine, and zuclopenthixol          | Possible  | No          |
| 148  | 65 M     | Neg | Generalised tonic-clonic seizure | Theophylline                                              | Possible  | No          |
| 149  | 34 F     | Pos | Optic neuritis                   | Ethambutol                                                | Certain   | Yes         |
| 150  | 34 F     | Neg | Headache                         | Levonorgestrel and estrogen (combined oral contraceptive) | Possible  | No          |
| 151  | 21 M     | Unk | Hallucination                    | Phenytoin                                                 | Probable  | Yes         |
| 152  | 29 M     | Neg | Aggression                       | Phenytoin                                                 | Certain   | Yes         |
| 153  | 40 F     | Pos | Acute psychosis                  | Efavirenz                                                 | Possible  | No          |
| 154† | 44 F     | Pos | Renal tubular disorder           | Tenofovir                                                 | Possible  | No          |
| 155  | 35 F     | Pos | Renal tubular disorder           | Kanamycin and tenofovir                                   | Certain   | Yes         |

\* Excludes patients admitted for drug-induced hypoglycaemia, drug-induced blood dyscrasias, drug-related haemorrhage, and drug-induced renal failure / impairment  
† Patient died (from any cause) during admission or 30-day follow-up period

F: female; M: male; neg: HIV-seronegative; pos: HIV-seropositive; unk: unknown

*Mouton JP, Njuguna C, Kramer N, Stewart A, Mehta U, Blockman M, et al.*  
*Adverse drug reactions causing admission to medical wards: a cross-sectional survey at four hospitals in South Africa.*  
**Supplemental Digital Content**

**SDC 13.** Summary of presentation of patients admitted for other\* Type B adverse reactions.

| Case | Age, sex | HIV | Adverse Drug Reaction     | Implicated Drugs    | Causality | Preventable |
|------|----------|-----|---------------------------|---------------------|-----------|-------------|
| 156  | 69 F     | Unk | Pancreatitis acute        | Simvastatin         | Possible  | No          |
| 157  | 51 M     | Pos | DRESS                     | Hydrochlorothiazide | Probable  | No          |
| 158  | 22 F     | Neg | DRESS                     | Phenytoin           | Certain   | No          |
| 159  | 72 M     | Unk | DRESS                     | Phenytoin           | Certain   | No          |
| 160  | 38 F     | Pos | DRESS                     | Rifampicin          | Certain   | No          |
| 161  | 58 M     | Neg | Dermatitis exfoliative    | Allopurinol         | Possible  | No          |
|      |          |     |                           | Imatinib            | Possible  | No          |
| 162  | 36 F     | Pos | Stevens-Johnson syndrome  | Co-trimoxazole      | Possible  | No          |
|      |          |     |                           | Unspecified ART     | Possible  | No          |
|      |          |     |                           | Unspecified TBT     | Possible  | No          |
| 163  | 57 F     | Unk | Angioedema                | Perindopril         | Certain   | No          |
| 164  | 50 F     | Unk | Interstitial lung disease | Methotrexate        | Possible  | No          |

\* Excludes admissions for drug-induced liver injury, drug-induced renal impairment, and drug-induced blood dyscrasias

† No known deaths (from any cause) during admission or 30-day follow-up period

ART: antiretroviral treatment; DRESS: drug reaction with eosinophilia and systemic symptoms; F: female; neg: HIV-seronegative; pos: HIV-seropositive; M: male; TBT: tuberculosis treatment; unk: unknown

**SDC 14.** All ADRs causing admission (n=164), mapped to higher-level terms, higher-level groups, and system-organ classes, according to the MedDRA® taxonomy. Asterisks indicate preferred terms mapping to more than one heading.

| <b>Adverse Drug Reaction</b>                     | <b>Frequency</b> | <b>Proportion</b> |
|--------------------------------------------------|------------------|-------------------|
| <b>Blood and lymphatic system disorders</b>      | <b>14</b>        | <b>8.5%</b>       |
| Anaemias, nonhaemolytic and marrow depression    | 6                | 3.6%              |
| Anaemias                                         | 4                | 2.4%              |
| Anaemia                                          | 2                | 1.2%              |
| Anaemia, macrocytic (*)                          | 1                | <1%               |
| Anaemia, normochromic normocytic                 | 1                | <1%               |
| Marrow depression and hypoplastic anaemias       | 2                | 1.2%              |
| Aplastic anaemia                                 | 1                | <1%               |
| Pancytopenia                                     | 1                | <1%               |
| Platelet disorders                               | 5                | 3.1%              |
| Thrombocytopenias                                | 5                | 3.1%              |
| Thrombocytopenia                                 | 5                | 3.1%              |
| White blood cell disorders                       | 3                | 1.8%              |
| Leukopaenias                                     | 1                | <1%               |
| Leukopaenia                                      | 1                | <1%               |
| Neutropaenias                                    | 2                | 1.2%              |
| Neutropaenia                                     | 2                | 1.2%              |
| <b>Cardiac disorders</b>                         | <b>14</b>        | <b>8.5%</b>       |
| Heart failures                                   | 9                | 5.5%              |
| Heart failures                                   | 9                | 5.5%              |
| Cardiac failure                                  | 9                | 5.5%              |
| Cardiac disorder signs and symptoms              | 4                | 2.4%              |
| Cardiac signs and symptoms                       | 4                | 2.4%              |
| Haemoptysis (*)                                  | 3                | 1.8%              |
| Syncope (*)                                      | 1                | <1%               |
| Coronary artery disorders                        | 1                | <1%               |
| Ischaemic coronary artery disorders              | 1                | <1%               |
| Acute myocardial infarction (*)                  | 1                | <1%               |
| <b>Endocrine disorders</b>                       | <b>24</b>        | <b>15%</b>        |
| Glucose metabolism disorders                     | 24               | 15%               |
| Hypoglycaemic conditions                         | 22               | 13%               |
| Hypoglycaemia (*)                                | 22               | 13%               |
| Diabetes mellitus                                | 2                | 1.2%              |
| Diabetes mellitus (*)                            | 2                | 1.2%              |
| <b>Eye disorders</b>                             | <b>1</b>         | <b>&lt;1%</b>     |
| Ocular infections, irritations and inflammations | 1                | <1%               |
| Optic nerve infections and inflammation          | 1                | <1%               |
| Optic neuritis (*)                               | 1                | <1%               |
| <b>Gastrointestinal disorders</b>                | <b>14</b>        | <b>8.5%</b>       |
| Gastrointestinal haemorrhages                    | 5                | 3.1%              |
| Non-site specific GI haemorrhage                 | 3                | 1.8%              |
| Gastrointestinal haemorrhage (*)                 | 2                | 1.2%              |
| Lower gastrointestinal haemorrhage (*)           | 1                | <1%               |
| Gastric and oesophageal haemorrhages             | 2                | 1.2%              |
| Gastric haemorrhage (*)                          | 2                | 1.2%              |
| Gastrointestinal inflammatory conditions         | 2                | 1.2%              |
| Gastritis (excl infective)                       | 2                | 1.2%              |
| Gastritis                                        | 1                | <1%               |
| Gastritis haemorrhagic (*)                       | 1                | <1%               |

**Mouton JP, Njuguna C, Kramer N, Stewart A, Mehta U, Blockman M, et al.**  
**Adverse drug reactions causing admission to medical wards: a cross-sectional survey at four hospitals in South Africa.**  
**Supplemental Digital Content**

|                                                               |           |             |
|---------------------------------------------------------------|-----------|-------------|
| Gastrointestinal signs and symptoms                           | 2         | 1.2%        |
| Nausea and vomiting symptoms                                  | 2         | 1.2%        |
| Vomiting                                                      | 2         | 1.2%        |
| Dental and gingival conditions                                | 1         | <1%         |
| Gingival haemorrhages                                         | 1         | <1%         |
| Gingival bleeding (*)                                         | 1         | <1%         |
| Exocrine pancreas conditions                                  | 1         | <1%         |
| Acute and chronic pancreatitis                                | 1         | <1%         |
| Acute pancreatitis                                            | 1         | <1%         |
| Gastrointestinal infections                                   | 1         | <1%         |
| Gastric and gastroenteric infections                          | 1         | <1%         |
| Gastroenteritis (*)                                           | 1         | <1%         |
| Gastrointestinal motility and defaecation disorders           | 1         | <1%         |
| Diarrhoea (excl infective)                                    | 1         | <1%         |
| Diarrhoea                                                     | 1         | <1%         |
| Peritoneal and retroperitoneal conditions                     | 1         | <1%         |
| Peritoneal and retroperitoneal haemorrhage                    | 1         | <1%         |
| Retroperitoneal haemorrhage (*)                               | 1         | <1%         |
| <b>General disorders and administration site conditions</b>   | <b>4</b>  | <b>2.4%</b> |
| General system disorders                                      | 4         | 2.4%        |
| Gait disorders                                                | 3         | 1.8%        |
| Ataxia (*)                                                    | 3         | 1.8%        |
| Asthenic conditions                                           | 1         | <1%         |
| Asthenia                                                      | 1         | <1%         |
| <b>Hepatobiliary disorders</b>                                | <b>20</b> | <b>12%</b>  |
| Hepatic and hepatobiliary disorders                           | 20        | 12%         |
| Hepatocellular damage and hepatitis                           | 16        | 9.8%        |
| Cholestatic liver injury                                      | 10        | 6.1%        |
| Hepatocellular injury                                         | 5         | 3.1%        |
| Mixed liver injury                                            | 1         | <1%         |
| Hepatic failure and associated disorders                      | 4         | 2.4%        |
| Hepatorenal failure (*)                                       | 4         | 2.4%        |
| <b>Immune system disorders</b>                                | <b>8</b>  | <b>4.9%</b> |
| Allergic conditions                                           | 7         | 4.3%        |
| Allergies to foods, food additives, drugs and other chemicals | 5         | 3.0%        |
| Drug reaction with eosinophilia and systemic symptoms (*)     | 4         | 2.4%        |
| Dermatitis exfoliative (*)                                    | 1         | <1%         |
| Allergic conditions                                           | 1         | <1%         |
| Stevens-Johnson syndrome (*)                                  | 1         | <1%         |
| Angioedemas                                                   | 1         | <1%         |
| Angioedema (*)                                                | 1         | <1%         |
| Autoimmune disorders                                          | 1         | <1%         |
| Nervous system autoimmune disorders                           | 1         | <1%         |
| Optic neuritis (*)                                            | 1         | <1%         |
| <b>Infections and infestations</b>                            | <b>8</b>  | <b>4.9%</b> |
| Infections - pathogen unspecified                             | 6         | 3.7%        |
| Lower respiratory tract and lung infections                   | 4         | 2.4%        |
| Pneumonia (*)                                                 | 4         | 2.4%        |
| Abdominal and gastrointestinal infections                     | 1         | <1%         |
| Gastroenteritis (*)                                           | 1         | <1%         |
| Urinary tract infections                                      | 1         | <1%         |
| Pyelonephritis acute                                          | 1         | <1%         |
| Ancillary infectious topics                                   | 1         | <1%         |
| Inflammatory disorders following infection                    | 1         | <1%         |
| Stevens-Johnson syndrome (*)                                  | 1         | <1%         |
| Fungal infectious disorders                                   | 1         | <1%         |

**Mouton JP, Njuguna C, Kramer N, Stewart A, Mehta U, Blockman M, et al.**  
**Adverse drug reactions causing admission to medical wards: a cross-sectional survey at four hospitals in South Africa.**  
**Supplemental Digital Content**

|                                                        |                                                |           |               |
|--------------------------------------------------------|------------------------------------------------|-----------|---------------|
|                                                        | <i>Pneumocystis</i> infections                 | 1         | <1%           |
|                                                        | <i>Pneumocystis jirovecii</i> pneumonia (*)    | 1         | <1%           |
| <b>Injury, poisoning and procedural complications</b>  |                                                | <b>3</b>  | <b>1.8%</b>   |
|                                                        | Bone and joint injuries                        | 1         | <1%           |
|                                                        | Bone and joint injuries                        | 1         | <1%           |
|                                                        | Haemarthrosis (*)                              | 1         | <1%           |
|                                                        | Exposures, chemical injuries and poisoning     | 1         | <1%           |
|                                                        | Poisoning and toxicity                         | 1         | <1%           |
|                                                        | Stevens-Johnson syndrome (*)                   | 1         | <1%           |
|                                                        | Injuries                                       | 1         | <1%           |
|                                                        | Cerebral injuries                              | 1         | <1%           |
|                                                        | Subarachnoid haemorrhage (*)                   | 1         | <1%           |
| <b>Metabolism and nutrition disorders</b>              |                                                | <b>34</b> | <b>21%</b>    |
|                                                        | Glucose metabolism disorders                   | 24        | 15%           |
|                                                        | Hypoglycaemic conditions                       | 22        | 13%           |
|                                                        | Hypoglycaemia (*)                              | 22        | 13%           |
|                                                        | Diabetes mellitus                              | 2         | 1.2%          |
|                                                        | Diabetes mellitus (*)                          | 2         | 1.2%          |
|                                                        | Electrolyte and fluid balance conditions       | 7         | 4.3%          |
|                                                        | Potassium imbalance                            | 4         | 2.4%          |
|                                                        | Hypokalaemia                                   | 3         | 1.8%          |
|                                                        | Hyperkalaemia                                  | 1         | <1%           |
|                                                        | Sodium imbalance                               | 3         | 1.8%          |
|                                                        | Hyponatraemia                                  | 3         | 1.8%          |
|                                                        | Acid-base disorders                            | 2         | 1.2%          |
|                                                        | Metabolic acidosis                             | 2         | 1.2%          |
|                                                        | Lactic acidosis                                | 2         | 1.2%          |
|                                                        | Vitamin-related disorders                      | 1         | <1%           |
|                                                        | Vitamin deficiencies                           | 1         | <1%           |
|                                                        | Anaemia macrocytic (*)                         | 1         | <1%           |
| <b>Musculoskeletal and connective tissue disorders</b> |                                                | <b>1</b>  | <b>&lt;1%</b> |
|                                                        | Joint disorders                                | 1         | <1%           |
|                                                        | Arthropathies                                  | 1         | <1%           |
|                                                        | Haemarthrosis (*)                              | 1         | <1%           |
| <b>Nervous system disorders</b>                        |                                                | <b>22</b> | <b>13%</b>    |
|                                                        | Neurological disorder                          | 13        | 7.9%          |
|                                                        | Cortical dysfunction                           | 8         | 4.9%          |
|                                                        | Confusional state (*)                          | 8         | 4.9%          |
|                                                        | Coordination and balance disturbance           | 3         | 1.8%          |
|                                                        | Ataxia (*)                                     | 3         | 1.8%          |
|                                                        | Disturbances in consciousness                  | 2         | 1.2%          |
|                                                        | Loss of consciousness                          | 1         | <1%           |
|                                                        | Syncope (*)                                    | 1         | <1%           |
|                                                        | CNS vascular disorder                          | 4         | 2.4%          |
|                                                        | CNS haemorrhages and cerebrovascular accidents | 4         | 2.4%          |
|                                                        | Cerebral haemorrhage (*)                       | 1         | <1%           |
|                                                        | Cerebrovascular accident (*)                   | 1         | <1%           |
|                                                        | Haemorrhage intracranial (*)                   | 1         | <1%           |
|                                                        | Subarachnoid haemorrhage (*)                   | 1         | <1%           |
|                                                        | Seizures                                       | 2         | 1.2%          |
|                                                        | Generalised tonic-clonic seizures              | 2         | 1.2%          |
|                                                        | Generalised tonic-clonic seizure               | 2         | 1.2%          |
|                                                        | Cranial nerve disorders                        | 1         | <1%           |
|                                                        | Optic nerve disorders                          | 1         | <1%           |
|                                                        | Optic neuritis (*)                             | 1         | <1%           |
|                                                        | Headaches                                      | 1         | <1%           |

**Mouton JP, Njuguna C, Kramer N, Stewart A, Mehta U, Blockman M, et al.**  
**Adverse drug reactions causing admission to medical wards: a cross-sectional survey at four hospitals in South Africa.**  
**Supplemental Digital Content**

|                                                                    |                                           |                                             |           |             |
|--------------------------------------------------------------------|-------------------------------------------|---------------------------------------------|-----------|-------------|
|                                                                    | Headaches                                 |                                             | 1         | <1%         |
|                                                                    |                                           | Headache                                    | 1         | <1%         |
| Neuromuscular disorders                                            |                                           |                                             | 1         | <1%         |
|                                                                    | Autonomic nervous system disorders        |                                             | 1         | <1%         |
|                                                                    |                                           | Orthostatic hypotension (*)                 | 1         | <1%         |
| <b>Psychiatric disorders</b>                                       |                                           |                                             | <b>11</b> | <b>6.7%</b> |
| Deliria                                                            |                                           |                                             | 8         | 4.9%        |
|                                                                    | Confusion and disorientation              |                                             | 8         | 4.9%        |
|                                                                    |                                           | Confusional state (*)                       | 8         | 4.9%        |
| Disturbances in thinking and perception                            |                                           |                                             | 1         | <1%         |
|                                                                    | Perception disturbances                   |                                             | 1         | <1%         |
|                                                                    |                                           | Hallucination                               | 1         | <1%         |
| Personality disorders and disturbances                             |                                           |                                             | 1         | <1%         |
|                                                                    | Behaviour and socialisation disturbances  |                                             | 1         | <1%         |
|                                                                    |                                           | Aggression                                  | 1         | <1%         |
| Schizophrenia and other psychotic disorders                        |                                           |                                             | 1         | <1%         |
|                                                                    | Psychotic disorder                        |                                             | 1         | <1%         |
|                                                                    |                                           | Acute psychosis                             | 1         | <1%         |
| <b>Renal and urinary disorders</b>                                 |                                           |                                             | <b>28</b> | <b>17%</b>  |
| Renal disorders (excl nephropathies)                               |                                           |                                             | 25        | 15%         |
|                                                                    | Renal failure and impairments             |                                             | 24        | 15%         |
|                                                                    |                                           | Renal failure acute                         | 13        | 7.9%        |
|                                                                    |                                           | Renal failure                               | 7         | 4.3%        |
|                                                                    |                                           | Hepatorenal failure (*)                     | 4         | 2.4%        |
|                                                                    | Renal infections and inflammations        |                                             | 1         | <1%         |
|                                                                    |                                           | Acute pyelonephritis                        | 1         | <1%         |
| Nephropathies                                                      |                                           |                                             | 2         | 1.2%        |
|                                                                    | Nephropathies and tubular disorders       |                                             | 2         | 1.2%        |
|                                                                    |                                           | Renal tubular disorder                      | 2         | 1.2%        |
| Urinary tract symptoms and signs                                   |                                           |                                             | 1         | <1%         |
|                                                                    | Urinary abnormalities                     |                                             | 1         | <1%         |
|                                                                    |                                           | Haematuria (*)                              | 1         | <1%         |
| <b>Reproductive system and breast disorders</b>                    |                                           |                                             | <b>2</b>  | <b>1.2%</b> |
| Menstrual cycle and uterine bleeding disorders                     |                                           |                                             | 2         | 1.2%        |
|                                                                    | Menstruation with increased bleeding      |                                             | 2         | 1.2%        |
|                                                                    |                                           | Menorrhagia                                 | 2         | 1.2%        |
| <b>Respiratory, thoracic and mediastinal disorders</b>             |                                           |                                             | <b>10</b> | <b>6.1%</b> |
| Respiratory tract infections                                       |                                           |                                             | 5         | 3.0%        |
|                                                                    | Lower respiratory tract infections        |                                             | 4         | 2.4%        |
|                                                                    |                                           | Pneumonia (*)                               | 4         | 2.4%        |
|                                                                    | Fungal lower respiratory tract infections |                                             | 1         | <1%         |
|                                                                    |                                           | <i>Pneumocystis jirovecii</i> pneumonia (*) | 1         | <1%         |
| Respiratory disorders                                              |                                           |                                             | 3         | 1.8%        |
|                                                                    | Coughing and associated symptoms          |                                             | 3         | 1.8%        |
|                                                                    |                                           | Haemoptysis (*)                             | 3         | 1.8%        |
| Lower respiratory tract disorders (excl obstruction and infection) |                                           |                                             | 1         | <1%         |
|                                                                    | Parenchymal lung disorders                |                                             | 1         | <1%         |
|                                                                    |                                           | Interstitial lung disease                   | 1         | <1%         |
| Upper respiratory tract disorders (excl infections)                |                                           |                                             | 1         | <1%         |
|                                                                    | Nasal disorders                           |                                             | 1         | <1%         |
|                                                                    |                                           | Epistaxis (*)                               | 1         | <1%         |
| <b>Skin and subcutaneous tissue disorders</b>                      |                                           |                                             | <b>7</b>  | <b>4.3%</b> |
| Epidermal and dermal conditions                                    |                                           |                                             | 6         | 3.7%        |
|                                                                    | Dermatitis ascribed to specific agent     |                                             | 4         | 2.4%        |

**Mouton JP, Njuguna C, Kramer N, Stewart A, Mehta U, Blockman M, et al.**  
**Adverse drug reactions causing admission to medical wards: a cross-sectional survey at four hospitals in South Africa.**  
**Supplemental Digital Content**

|                                                                 |                                                           |           |            |
|-----------------------------------------------------------------|-----------------------------------------------------------|-----------|------------|
|                                                                 | Drug reaction with eosinophilia and systemic symptoms (*) | 4         | 2.4%       |
| Bullous conditions                                              |                                                           | 1         | <1%        |
|                                                                 | Stevens-Johnson syndrome (*)                              | 1         | <1%        |
| Exfoliative conditions                                          |                                                           | 1         | <1%        |
|                                                                 | Dermatitis exfoliative (*)                                | 1         | <1%        |
| Angioedema and urticaria                                        |                                                           | 1         | <1%        |
| Angioedemas                                                     |                                                           | 1         | <1%        |
|                                                                 | Angioedema (*)                                            | 1         | <1%        |
| <b>Vascular disorders</b>                                       |                                                           | <b>24</b> | <b>15%</b> |
| Vascular haemorrhagic disorders                                 |                                                           | 17        | 10%        |
| Gastrointestinal haemorrhages                                   |                                                           | 7         | 4.3%       |
|                                                                 | Gastric haemorrhage (*)                                   | 2         | 1.2%       |
|                                                                 | Gastrointestinal haemorrhage (*)                          | 2         | 1.2%       |
|                                                                 | Gastritis haemorrhagic (*)                                | 1         | <1%        |
|                                                                 | Gingival bleeding (*)                                     | 1         | <1%        |
|                                                                 | Lower gastrointestinal haemorrhage (*)                    | 1         | <1%        |
| Haemorrhages                                                    |                                                           | 7         | 4.3%       |
|                                                                 | Haemoptysis (*)                                           | 3         | 1.8%       |
|                                                                 | Epistaxis (*)                                             | 1         | <1%        |
|                                                                 | Haemarthrosis (*)                                         | 1         | <1%        |
|                                                                 | Haematuria (*)                                            | 1         | <1%        |
|                                                                 | Retroperitoneal haemorrhage (*)                           | 1         | <1%        |
| Nervous system haemorrhagic disorders                           |                                                           | 3         | 1.8%       |
|                                                                 | Cerebral haemorrhage (*)                                  | 1         | <1%        |
|                                                                 | Haemorrhage intracranial (*)                              | 1         | <1%        |
|                                                                 | Subarachnoid haemorrhage (*)                              | 1         | <1%        |
| Decreased and nonspecific blood pressure disorders and shock    |                                                           | 5         | 3.0%       |
| Vascular hypotensive disorders                                  |                                                           | 4         | 2.4%       |
|                                                                 | Hypotension                                               | 3         | 1.8%       |
|                                                                 | Orthostatic hypotension (*)                               | 1         | <1%        |
| Circulatory collapse and shock                                  |                                                           | 1         | <1%        |
|                                                                 | Syncope (*)                                               | 1         | <1%        |
| Arteriosclerosis, stenosis, vascular insufficiency and necrosis |                                                           | 1         | <1%        |
| Coronary necrosis and vascular insufficiency                    |                                                           | 1         | <1%        |
|                                                                 | Acute myocardial infarction (*)                           | 1         | <1%        |
| Vascular disorders                                              |                                                           | 1         | <1%        |
| Cerebrovascular and spinal vascular disorders                   |                                                           | 1         | <1%        |
|                                                                 | Cerebrovascular accident (*)                              | 1         | <1%        |

**SDC 15.** Drugs implicated in ADR-related admissions, by ATC-classification.

| Drug class / Drug                                                    | Number of ADR-related admissions in which the drug / drug class was implicated |                                 |                                  |                                 | Total <sup>e</sup> |
|----------------------------------------------------------------------|--------------------------------------------------------------------------------|---------------------------------|----------------------------------|---------------------------------|--------------------|
|                                                                      | Type A ADRs (alone) <sup>a</sup>                                               | Type A ADRs (comb) <sup>b</sup> | Type B ADRs (alone) <sup>c</sup> | Type B ADRs (comb) <sup>d</sup> |                    |
| <b>A ALIMENTARY TRACT AND METABOLISM</b>                             | <b>12</b>                                                                      | <b>11</b>                       |                                  |                                 | <b>23</b>          |
| A10 Drugs used in diabetes                                           | 12                                                                             | 11                              |                                  |                                 | 23                 |
| A10A Insulins and analogues                                          | 9                                                                              | 5                               |                                  |                                 | 14                 |
| A10B Oral blood glucose lowering drugs                               | 3                                                                              | 11                              |                                  |                                 | 14                 |
| A10BA Biguanides                                                     | 1                                                                              | 10                              |                                  |                                 | 11                 |
| A10BA02 Metformin                                                    | 1                                                                              | 10                              |                                  |                                 | 11                 |
| A10BB Sulfonamides, urea derivatives                                 | 1                                                                              | 9                               |                                  |                                 | 11                 |
| A10BB01 Glibenclamide                                                | 1                                                                              | 3                               |                                  |                                 | 4                  |
| A10BB09 Gliclazide                                                   | 1                                                                              | 6                               |                                  |                                 | 7                  |
| Unspecified oral blood glucose lowering drugs                        |                                                                                | 1                               |                                  |                                 | 1                  |
| <b>B BLOOD AND BLOOD FORMING ORGANS</b>                              | <b>17</b>                                                                      | <b>1</b>                        |                                  |                                 | <b>18</b>          |
| B01 Antithrombotic agents                                            | 16                                                                             | 1                               |                                  |                                 | 17                 |
| B01A Antithrombotic agents                                           | 16                                                                             | 1                               |                                  |                                 | 17                 |
| B01AA Vitamin K antagonists                                          | 13                                                                             |                                 |                                  |                                 | 13                 |
| B01AA03 Warfarin                                                     | 13                                                                             |                                 |                                  |                                 | 13                 |
| B01AC Platelet aggregation inhibitors, excl. heparins                | 3                                                                              | 1                               |                                  |                                 | 4                  |
| B01AC06 Acetylsalicylic acid                                         | 3                                                                              | 1                               |                                  |                                 | 4                  |
| B02 Antihemorrhagics                                                 | 1                                                                              |                                 |                                  |                                 | 1                  |
| B02A Antifibrinolytics                                               | 1                                                                              |                                 |                                  |                                 | 1                  |
| B02AA Amino acids                                                    | 1                                                                              |                                 |                                  |                                 | 1                  |
| B02AA02 Tranexamic acid                                              | 1                                                                              |                                 |                                  |                                 | 1                  |
| <b>C CARDIOVASCULAR SYSTEM</b>                                       | <b>16</b>                                                                      | <b>16</b>                       | <b>4</b>                         | <b>1</b>                        | <b>37</b>          |
| C01 Cardiac therapy                                                  | 2                                                                              |                                 |                                  |                                 | 2                  |
| C01A Cardiac glycosides                                              | 2                                                                              |                                 |                                  |                                 | 2                  |
| C01AA Digitalis glycosides                                           | 2                                                                              |                                 |                                  |                                 | 2                  |
| C01AA05 Digoxin                                                      | 2                                                                              |                                 |                                  |                                 | 2                  |
| C02 Antihypertensives                                                |                                                                                | 1                               |                                  |                                 | 1                  |
| C02D Arteriolar smooth muscle, agents acting on                      |                                                                                | 1                               |                                  |                                 | 1                  |
| C02DB Hydrazinophthalazine derivatives                               |                                                                                | 1                               |                                  |                                 | 1                  |
| C02DB02 Hydralazine                                                  |                                                                                | 1                               |                                  |                                 | 1                  |
| C03 Diuretics                                                        | 4                                                                              | 14                              | 1                                |                                 | 19                 |
| C03A Low-ceiling diuretics, thiazides                                | 3                                                                              | 6                               | 1                                |                                 | 10                 |
| C03AA Thiazides, plain                                               | 3                                                                              | 6                               | 1                                |                                 | 10                 |
| C03AA03 Hydrochlorothiazide                                          | 3                                                                              | 6                               | 1                                |                                 | 10                 |
| C03C High-ceiling diuretics                                          | 1                                                                              | 10                              |                                  |                                 | 11                 |
| C03CA Sulfonamides, plain                                            | 1                                                                              | 10                              |                                  |                                 | 11                 |
| C03CA01 Furosemide                                                   | 1                                                                              | 10                              |                                  |                                 | 11                 |
| C03D Potassium-sparing agents                                        |                                                                                | 2                               |                                  |                                 | 2                  |
| C03DA Aldosterone antagonists                                        |                                                                                | 2                               |                                  |                                 | 2                  |
| C03DA01 Spironolactone                                               |                                                                                | 2                               |                                  |                                 | 2                  |
| C07 Beta-blocking agents                                             | 6                                                                              | 6                               |                                  |                                 | 12                 |
| C07A Beta-blocking agents                                            | 6                                                                              | 6                               |                                  |                                 | 12                 |
| C07AA Beta-blocking agents, non-selective                            | 1                                                                              | 1                               |                                  |                                 | 2                  |
| C07AA05 Propranolol                                                  | 1                                                                              | 1                               |                                  |                                 | 2                  |
| C07AB Beta-blocking agents, selective                                | 3                                                                              | 4                               |                                  |                                 | 7                  |
| C07AB03 Atenolol                                                     | 3                                                                              | 4                               |                                  |                                 | 7                  |
| C07AG Alpha- and beta-blocking agents                                | 2                                                                              | 1                               |                                  |                                 | 3                  |
| C07AG02 Carvedilol                                                   | 2                                                                              | 1                               |                                  |                                 | 3                  |
| C08 Calcium channel blockers                                         | 1                                                                              | 5                               |                                  |                                 | 6                  |
| C08C Selective calcium channel blockers with mainly vascular effects | 1                                                                              | 4                               |                                  |                                 | 5                  |



**Mouton JP, Njuguna C, Kramer N, Stewart A, Mehta U, Blockman M, et al.**  
**Adverse drug reactions causing admission to medical wards: a cross-sectional survey at four hospitals in South Africa.**  
**Supplemental Digital Content**

| Drug class / Drug                                                        | Number of ADR-related admissions in which the drug / drug class was implicated |                                 |                                  |                                 | Total <sup>e</sup> |
|--------------------------------------------------------------------------|--------------------------------------------------------------------------------|---------------------------------|----------------------------------|---------------------------------|--------------------|
|                                                                          | Type A ADRs (alone) <sup>a</sup>                                               | Type A ADRs (comb) <sup>b</sup> | Type B ADRs (alone) <sup>c</sup> | Type B ADRs (comb) <sup>d</sup> |                    |
| C08CA Dihydropyridine derivatives                                        | 1                                                                              | 4                               |                                  |                                 | 5                  |
| C08CA01 Amlodipine                                                       |                                                                                | 4                               |                                  |                                 | 4                  |
| C08CA05 Nifedipine                                                       | 1                                                                              |                                 |                                  |                                 | 1                  |
| C08D Selective calcium channel blockers with direct cardiac effects      |                                                                                | 1                               |                                  |                                 | 1                  |
| C08DB Benzothiazepine derivatives                                        |                                                                                | 1                               |                                  |                                 | 1                  |
| C08DB01 Diltiazem                                                        |                                                                                | 1                               |                                  |                                 | 1                  |
| C09 Agents acting on the renin-angiotensin system                        | 3                                                                              | 10                              | 2                                | 1                               | 16                 |
| C09A ACE-inhibitors, plain                                               | 3                                                                              | 9                               | 2                                | 1                               | 15                 |
| C09AA ACE-inhibitors, plain                                              | 3                                                                              | 9                               | 2                                | 1                               | 15                 |
| C09AA01 Captopril                                                        |                                                                                | 1                               |                                  |                                 | 1                  |
| C09AA02 Enalapril                                                        | 3                                                                              | 8                               | 1                                | 1                               | 13                 |
| C09AA04 Perindopril                                                      |                                                                                |                                 | 1                                |                                 | 1                  |
| C09B ACE-inhibitors, combinations                                        |                                                                                | 1                               |                                  |                                 | 1                  |
| C09BA ACE-inhibitors and diuretics                                       |                                                                                | 1                               |                                  |                                 | 1                  |
| C09BA04 Perindopril and diuretics                                        |                                                                                | 1                               |                                  |                                 | 1                  |
| C09C Angiotensin II antagonists, plain                                   |                                                                                | 1                               |                                  |                                 | 1                  |
| C09CA Angiotensin II antagonists, plain                                  |                                                                                | 1                               |                                  |                                 | 1                  |
| C09CA03 Valsartan                                                        |                                                                                | 1                               |                                  |                                 | 1                  |
| C10 Serum lipid reducing agents                                          |                                                                                |                                 | 1                                |                                 | 1                  |
| C10A Cholesterol and triglyceride reducers                               |                                                                                |                                 | 1                                |                                 | 1                  |
| C10AA HMG-coA reductase inhibitors                                       |                                                                                |                                 | 1                                |                                 | 1                  |
| C10AA01 Simvastatin                                                      |                                                                                |                                 | 1                                |                                 | 1                  |
| <b>G GENITO-URINARY SYSTEM AND SEX HORMONES</b>                          | <b>1</b>                                                                       |                                 |                                  |                                 | <b>1</b>           |
| G03 Sex hormones and modulators of the genital system                    | 1                                                                              |                                 |                                  |                                 | 1                  |
| G03A Hormonal contraceptives for systemic use                            | 1                                                                              |                                 |                                  |                                 | 1                  |
| G03AA Progestogens and oestrogens, fixed combinations                    | 1                                                                              |                                 |                                  |                                 | 1                  |
| G03AA07 Levonorgestrel and oestrogen                                     | 1                                                                              |                                 |                                  |                                 | 1                  |
| <b>H SYSTEMIC HORMONAL PREPARATIONS, EXCL. SEX HORMONES AND INSULINS</b> | <b>3</b>                                                                       | <b>5</b>                        |                                  |                                 | <b>8</b>           |
| H02 Corticosteroids for systemic use                                     | 3                                                                              | 5                               |                                  |                                 | 8                  |
| H02A Corticosteroids for systemic use, plain                             | 3                                                                              | 5                               |                                  |                                 | 8                  |
| H02AB Glucocorticoids                                                    | 3                                                                              | 5                               |                                  |                                 | 8                  |
| H02AB07 Prednisone                                                       | 3                                                                              | 5                               |                                  |                                 | 8                  |
| <b>J ANTI-INFECTIVES FOR SYSTEMIC USE</b>                                | <b>25</b>                                                                      | <b>4</b>                        | <b>14</b>                        | <b>14</b>                       | <b>57</b>          |
| J01 Antibacterials for systemic use                                      | 4                                                                              | 2                               | 2                                | 8                               | 16                 |
| J01C Beta-lactam antibacterials, penicillins                             |                                                                                |                                 |                                  | 3                               | 3                  |
| J01CA Penicillins with extended spectrum                                 |                                                                                |                                 |                                  | 1                               | 1                  |
| J01CA04 Amoxicillin                                                      |                                                                                |                                 |                                  | 1                               | 1                  |
| J01CR Combinations of penicillins, incl. beta-lactamase inhibitors       |                                                                                |                                 |                                  | 2                               | 2                  |
| J01CR02 Co-amoxiclav                                                     |                                                                                |                                 |                                  | 2                               | 2                  |
| J01E Sulfonamides and trimethoprim                                       | 4                                                                              | 1                               | 2                                | 4                               | 11                 |
| J01EE Combinations of sulfonamides and trimethoprim, incl. derivatives   | 4                                                                              | 1                               | 2                                | 4                               | 11                 |
| J01EE01 Sulfamethoxazole and trimethoprim                                | 4                                                                              | 1                               | 2                                | 4                               | 11                 |
| J01F Macrolides, lincosamides and streptogramins                         |                                                                                |                                 |                                  | 1                               | 1                  |
| J01FA Macrolides                                                         |                                                                                |                                 |                                  | 1                               | 1                  |
| J01FA01 Erythromycin                                                     |                                                                                |                                 |                                  | 1                               | 1                  |
| J01G Aminoglycoside antibacterials                                       |                                                                                | 1                               |                                  |                                 | 1                  |
| J01GB Other aminoglycosides                                              |                                                                                | 1                               |                                  |                                 | 1                  |
| J01GB04 Kanamycin                                                        |                                                                                | 1                               |                                  |                                 | 1                  |
| J04 Antimycobacterials                                                   | 1                                                                              |                                 | 9                                | 9                               | 19                 |
| J04A Drugs for treatment of tuberculosis                                 | 1                                                                              |                                 | 9                                | 9                               | 19                 |
| J04AB Antibiotics                                                        |                                                                                |                                 | 9                                | 8                               | 17                 |

*Mouton JP, Njuguna C, Kramer N, Stewart A, Mehta U, Blockman M, et al.*  
*Adverse drug reactions causing admission to medical wards: a cross-sectional survey at four hospitals in South Africa.*  
**Supplemental Digital Content**

| Drug class / Drug                                                         | Number of ADR-related admissions in which the drug / drug class was implicated |                                 |                                  |                                 | Total <sup>e</sup> |
|---------------------------------------------------------------------------|--------------------------------------------------------------------------------|---------------------------------|----------------------------------|---------------------------------|--------------------|
|                                                                           | Type A ADRs (alone) <sup>a</sup>                                               | Type A ADRs (comb) <sup>b</sup> | Type B ADRs (alone) <sup>c</sup> | Type B ADRs (comb) <sup>d</sup> |                    |
| J04AB02 Rifampicin                                                        |                                                                                |                                 | 9                                | 8                               | 17                 |
| J04AC Hydrazides                                                          |                                                                                |                                 |                                  | 5                               | 5                  |
| J04AC01 Isoniazid                                                         |                                                                                |                                 |                                  | 5                               | 5                  |
| J04AK Other drugs for treatment of tuberculosis                           | 1                                                                              |                                 |                                  | 3                               | 4                  |
| J04AK01 Pyrazinamide                                                      |                                                                                |                                 |                                  | 3                               | 3                  |
| J04AK02 Ethambutol                                                        | 1                                                                              |                                 |                                  |                                 | 1                  |
| Unspecified treatment for tuberculosis                                    |                                                                                |                                 |                                  | 1                               | 1                  |
| J05 Antivirals for systemic use                                           | 20                                                                             | 3                               | 3                                | 6                               | 32                 |
| J05A Direct-acting antivirals                                             | 20                                                                             | 3                               | 3                                | 6                               | 32                 |
| J05AB Nucleosides and nucleotides, excl. reverse transcriptase inhibitors |                                                                                |                                 |                                  | 1                               | 1                  |
| J05AB01 Aciclovir                                                         |                                                                                |                                 |                                  | 1                               | 1                  |
| J05AE Protease inhibitors                                                 | 1                                                                              |                                 |                                  |                                 | 1                  |
| J05AE30 Lopinavir-ritonavir                                               | 1                                                                              |                                 |                                  |                                 | 1                  |
| J05AF Nucleoside and nucleotide reverse transcriptase inhibitors          | 15                                                                             | 3                               |                                  | 3                               | 21                 |
| J05AF01 Zidovudine                                                        | 3                                                                              | 1                               |                                  |                                 | 4                  |
| J05AF04 Stavudine                                                         | 3                                                                              |                                 |                                  |                                 | 3                  |
| J05AF05 Lamivudine                                                        |                                                                                | 1                               |                                  |                                 | 1                  |
| J05AF07 Tenofovir disoproxil                                              | 9                                                                              | 2                               |                                  | 3                               | 14                 |
| J05AF09 Emtricitabine                                                     |                                                                                | 1                               |                                  |                                 | 1                  |
| J05AG Non-nucleoside reverse transcriptase inhibitors                     | 4                                                                              | 1                               | 3                                | 2                               | 10                 |
| J05AG01 Nevirapine                                                        |                                                                                |                                 |                                  | 1                               | 1                  |
| J05AG03 Efavirenz                                                         | 4                                                                              | 1                               | 3                                | 1                               | 9                  |
| Unspecified antiretroviral therapy                                        |                                                                                |                                 |                                  | 1                               | 1                  |
| <b>L ANTINEOPLASTIC AND IMMUNOMODULATING AGENTS</b>                       | <b>2</b>                                                                       | <b>4</b>                        | <b>1</b>                         | <b>1</b>                        | <b>8</b>           |
| L01 Antineoplastic agents                                                 | 1                                                                              | 1                               |                                  | 1                               | 3                  |
| L01A Alkylating agents                                                    |                                                                                | 1                               |                                  |                                 | 1                  |
| L01AA Nitrogen mustard analogues                                          |                                                                                | 1                               |                                  |                                 | 1                  |
| L01AA02 Chlorambucil                                                      |                                                                                | 1                               |                                  |                                 | 1                  |
| L01X Other antineoplastic agents                                          | 1                                                                              |                                 |                                  | 1                               | 2                  |
| L01XE Protein kinase inhibitors                                           | 1                                                                              |                                 |                                  | 1                               | 2                  |
| L01XE01 Imatinib                                                          | 1                                                                              |                                 |                                  | 1                               | 2                  |
| L04 Immunosuppressive agents                                              | 1                                                                              | 3                               | 1                                |                                 | 5                  |
| L04A Immunosuppressive agents                                             | 1                                                                              | 3                               |                                  |                                 | 5                  |
| L04AD Calcineurin inhibitors                                              | 1                                                                              | 1                               |                                  |                                 | 2                  |
| L04AD01 Ciclosporin                                                       | 1                                                                              |                                 |                                  |                                 | 1                  |
| L04AD02 Tacrolimus                                                        |                                                                                | 1                               |                                  |                                 | 1                  |
| L04AX Other immunosuppressive agents                                      |                                                                                | 2                               | 1                                |                                 | 3                  |
| L04AX01 Azathioprine                                                      |                                                                                | 1                               |                                  |                                 | 1                  |
| L04AX03 Methotrexate                                                      |                                                                                | 1                               | 1                                |                                 | 2                  |
| <b>M MUSCULO-SKELETAL SYSTEM</b>                                          | <b>3</b>                                                                       |                                 |                                  | <b>4</b>                        | <b>7</b>           |
| M01 Anti-inflammatory and antirheumatic products                          | 3                                                                              |                                 |                                  | 2                               | 5                  |
| M01A Anti-inflammatory and antirheumatic products, non-steroids           | 3                                                                              |                                 |                                  | 2                               | 5                  |
| M01AB Acetic acid derivatives and related substances                      | 1                                                                              |                                 |                                  | 1                               | 2                  |
| M01AB01 Indometacin                                                       |                                                                                |                                 |                                  | 1                               | 1                  |
| M01AB05 Diclofenac                                                        | 1                                                                              |                                 |                                  |                                 | 1                  |
| M01AE Propionic acid derivatives                                          |                                                                                |                                 |                                  | 1                               | 1                  |
| M01AE01 Ibuprofen                                                         |                                                                                |                                 |                                  | 1                               | 1                  |
| Unspecified non-steroidal anti-inflammatories                             | 2                                                                              |                                 |                                  |                                 | 2                  |
| M04 Antigout preparations                                                 |                                                                                |                                 |                                  | 2                               | 2                  |
| M04A Antigout preparations                                                |                                                                                |                                 |                                  | 2                               | 2                  |
| M04AA Preparations inhibiting uric acid production                        |                                                                                |                                 |                                  | 2                               | 2                  |
| M04AA01 Allopurinol                                                       |                                                                                |                                 |                                  | 2                               | 2                  |
| M04AC Preparations with no effect on uric acid metabolism                 |                                                                                |                                 |                                  | 1                               | 1                  |
| M04AC01 Colchicine                                                        |                                                                                |                                 |                                  | 1                               | 1                  |

*Mouton JP, Njuguna C, Kramer N, Stewart A, Mehta U, Blockman M, et al.*  
*Adverse drug reactions causing admission to medical wards: a cross-sectional survey at four hospitals in South Africa.*  
**Supplemental Digital Content**

| Drug class / Drug                                            | Number of ADR-related admissions in which the drug / drug class was implicated |                                 |                                  |                                 | Total <sup>e</sup> |
|--------------------------------------------------------------|--------------------------------------------------------------------------------|---------------------------------|----------------------------------|---------------------------------|--------------------|
|                                                              | Type A ADRs (alone) <sup>a</sup>                                               | Type A ADRs (comb) <sup>b</sup> | Type B ADRs (alone) <sup>c</sup> | Type B ADRs (comb) <sup>d</sup> |                    |
| <b>N NERVOUS SYSTEM</b>                                      | <b>9</b>                                                                       | <b>4</b>                        | <b>3</b>                         |                                 | <b>16</b>          |
| N02 Analgesics                                               | 2                                                                              | 2                               |                                  |                                 | 4                  |
| N02A Opioids                                                 | 1                                                                              | 2                               |                                  |                                 | 3                  |
| N02AX Other opioids                                          | 1                                                                              | 2                               |                                  |                                 | 3                  |
| N02AX02 Tramadol                                             | 1                                                                              | 2                               |                                  |                                 | 3                  |
| N02B Other analgesics and antipyretics                       | 1                                                                              |                                 |                                  |                                 | 1                  |
| N02BE Anilides                                               | 1                                                                              |                                 |                                  |                                 | 1                  |
| N02BE51 Paracetamol, combinations excl. psycholeptics        | 1                                                                              |                                 |                                  |                                 | 1                  |
| N03 Anti-epileptics                                          | 7                                                                              | 2                               | 3                                |                                 | 12                 |
| N03A Anti-epileptics                                         | 7                                                                              | 2                               | 3                                |                                 | 12                 |
| N03AA Barbiturates and derivatives                           |                                                                                | 1                               |                                  |                                 | 1                  |
| N03AA02 Phenobarbital                                        |                                                                                | 1                               |                                  |                                 | 1                  |
| N03AB Hydantoin derivatives                                  | 7                                                                              | 2                               | 2                                |                                 | 11                 |
| N03AB02 Phenytoin                                            | 7                                                                              | 2                               | 2                                |                                 | 11                 |
| N03AE Benzodiazepine derivatives                             |                                                                                | 1                               |                                  |                                 | 1                  |
| N03AE01 Clonazepam                                           |                                                                                | 1                               |                                  |                                 | 1                  |
| N03AG Fatty acid derivatives                                 |                                                                                |                                 | 1                                |                                 | 1                  |
| N03AG01 Valproic acid                                        |                                                                                |                                 | 1                                |                                 | 1                  |
| N04 Anti-Parkinson drugs                                     |                                                                                | 1                               |                                  |                                 | 1                  |
| N04B Dopaminergic agents                                     |                                                                                | 1                               |                                  |                                 | 1                  |
| N04BA Dopa and dopa derivatives                              |                                                                                | 1                               |                                  |                                 | 1                  |
| N04BA02 Levodopa and decarboxylase inhibitor                 |                                                                                | 1                               |                                  |                                 | 1                  |
| N05 Psycholeptics                                            |                                                                                | 2                               |                                  |                                 | 2                  |
| N05A Antipsychotics                                          |                                                                                | 2                               |                                  |                                 | 2                  |
| N05AA Phenothiazines with aliphatic side-chain               |                                                                                | 1                               |                                  |                                 | 1                  |
| N05AA01 Chlorpromazine                                       |                                                                                | 1                               |                                  |                                 | 1                  |
| N05AF Thioxanthene derivatives                               |                                                                                | 1                               |                                  |                                 | 1                  |
| N05AF05 Zuclopenthixol                                       |                                                                                | 1                               |                                  |                                 | 1                  |
| N05AX Other antipsychotics                                   |                                                                                | 1                               |                                  |                                 | 1                  |
| N05AX08 Risperidone                                          |                                                                                | 1                               |                                  |                                 | 1                  |
| N05C Hypnotics and sedatives                                 |                                                                                | 1                               |                                  |                                 | 1                  |
| N05CF Benzodiazepine-related drugs                           |                                                                                | 1                               |                                  |                                 | 1                  |
| N05CF01 Zopiclone                                            |                                                                                | 1                               |                                  |                                 | 1                  |
| <b>P ANTIPARASITIC PRODUCTS, INSECTICIDES AND REPELLENTS</b> |                                                                                | <b>1</b>                        |                                  |                                 | <b>1</b>           |
| P01 Antiprotozoals                                           |                                                                                | 1                               |                                  |                                 | 1                  |
| P01B Antimalarials                                           |                                                                                | 1                               |                                  |                                 | 1                  |
| P01BA Aminoquinolines                                        |                                                                                | 1                               |                                  |                                 | 1                  |
| P01BA01 Chloroquine                                          |                                                                                | 1                               |                                  |                                 | 1                  |
| <b>R RESPIRATORY SYSTEM</b>                                  | <b>1</b>                                                                       | <b>1</b>                        |                                  |                                 | <b>2</b>           |
| R03 Drugs for obstructive airway                             | 1                                                                              | 1                               |                                  |                                 | 2                  |
| R03D Other systemic drugs for obstructive airway diseases    | 1                                                                              | 1                               |                                  |                                 | 2                  |
| R03DA Xanthines                                              | 1                                                                              | 1                               |                                  |                                 | 2                  |
| R03DA04 Theophylline                                         | 1                                                                              | 1                               |                                  |                                 | 2                  |

(a) Number of type A ADR-related admissions in which the drug / drug class was the sole implicated drug.

(b) Number of type A ADR-related admissions in which the drug / drug class was an implicated drug in combination with other drugs.

(c) Number of type B ADR-related admissions in which the drug / drug class was the sole implicated drug.

(d) Number of type B ADR-related admissions in which the drug / drug class was an implicated drug together with other implicated drugs.

(e) Total number of ADR-related admissions in which the drug / drug class was implicated.

**SDC 16.** Alternative generalized estimation equation model of associations with adverse drug reaction-related admission, including all admissions (n=1951 admissions in 1904 patients).

|                                      | n    | Crude |                |              | Adjusted <sup>d</sup> |                |              |
|--------------------------------------|------|-------|----------------|--------------|-----------------------|----------------|--------------|
|                                      |      | OR    | (95% CI)       | Wald P value | OR                    | (95% CI)       | Wald P value |
| <b>Sex</b>                           |      |       |                |              |                       |                |              |
| Male (referent)                      | 864  | 1.00  |                |              | 1.00                  |                |              |
| Female                               | 1087 | 1.67  | (1.19 to 2.35) | .003         | 1.57                  | (1.10 to 2.23) | .01          |
| <b>Age<sup>a</sup></b>               | 1951 | 1.06  | (0.98 to 1.15) | .17          | 1.03                  | (0.92 to 1.15) | .65          |
| <b>HIV and ART</b>                   |      |       |                |              |                       |                |              |
| HIV-negative/unknown (referent)      | 1378 | 1.00  |                |              | 1.00                  |                |              |
| HIV-infected, not on ART             | 259  | 0.69  | (0.38 to 1.25) | .22          | 1.04                  | (0.54 to 2.00) | .91          |
| HIV-infected, on ART                 | 314  | 2.43  | (1.69 to 3.51) | <.001        | 2.02                  | (1.22 to 3.33) | .006         |
| <b>Anti-tuberculosis therapy</b>     |      |       |                |              |                       |                |              |
| Not on ATT (referent)                | 1764 | 1.00  |                |              | 1.00                  |                |              |
| On ATT                               | 187  | 2.41  | (1.57 to 3.72) | <.001        | 1.24                  | (0.72 to 2.12) | .44          |
| <b>Drug count<sup>b</sup></b>        | 1951 | 1.23  | (1.18 to 1.28) | <.001        | 1.17                  | (1.11 to 1.23) | <.001        |
| <b>Comorbidity score<sup>c</sup></b> | 1951 | 1.34  | (1.20 to 1.51) | <.001        | 1.24                  | (1.07 to 1.42) | .003         |

(a) Included in the model as a continuous variable. The reported odds ratio is for each 10-year increment.

(b) Included in the model as a continuous variable. The reported odds ratio is for each additional drug.

(c) Included in the model as a continuous variable. The reported odds ratio is for each additional point on the modified Charlson comorbidity score.

(d) Adjusted for other factors in the model.

ART: antiretroviral therapy, ATT: antituberculosis therapy, CI: confidence interval, OR: odds ratio.

**SDC 17.** Alternative generalized estimation equation model of associations with adverse drug reaction-related admission, excluding patients in whom no drug history was recorded in the medical records, as well as patients documented to have had zero drug exposure (n=1469 admissions in 1432 patients).

|                                      | n    | Crude |                |              | Adjusted <sup>d</sup> |                |              |
|--------------------------------------|------|-------|----------------|--------------|-----------------------|----------------|--------------|
|                                      |      | OR    | (95% CI)       | Wald P value | OR                    | (95% CI)       | Wald P value |
| <b>Sex</b>                           |      |       |                |              |                       |                |              |
| Male (referent)                      | 603  | 1.00  |                |              | 1.00                  |                |              |
| Female                               | 866  | 1.47  | (1.04 to 2.08) | .03          | 1.47                  | (1.04 to 2.09) | .03          |
| <b>Age<sup>a</sup></b>               | 1469 | 1.00  | (0.92 to 1.09) | .94          | 1.00                  | (0.90 to 1.12) | .96          |
| <b>HIV and ART</b>                   |      |       |                |              |                       |                |              |
| HIV-negative/unknown (referent)      | 1029 | 1.00  |                |              | 1.00                  |                |              |
| HIV-infected, not on ART             | 126  | 1.10  | (0.59 to 2.02) | .77          | 1.28                  | (0.65 to 2.52) | .48          |
| HIV-infected, on ART                 | 314  | 1.76  | (1.22 to 2.55) | .002         | 1.77                  | (1.09 to 2.85) | .02          |
| <b>Anti-tuberculosis therapy</b>     |      |       |                |              |                       |                |              |
| Not on ATT (referent)                | 1282 | 1.00  |                |              | 1.00                  |                |              |
| On ATT                               | 187  | 1.69  | (1.10 to 2.61) | .02          | 1.21                  | (0.73 to 2.00) | .46          |
| <b>Drug count<sup>b</sup></b>        | 1469 | 1.15  | (1.10 to 1.20) | <.001        | 1.11                  | (1.05 to 1.17) | <.001        |
| <b>Comorbidity score<sup>c</sup></b> | 1469 | 1.23  | (1.09 to 1.39) | .001         | 1.22                  | (1.07 to 1.41) | .004         |

(a) Included in the model as a continuous variable. The reported odds ratio is for each 10-year increment.

(b) Included in the model as a continuous variable. The reported odds ratio is for each additional drug.

(c) Included in the model as a continuous variable. The reported odds ratio is for each additional point on the modified Charlson comorbidity score.

(d) Adjusted for other factors in the model.

ART: antiretroviral therapy, ATT: antituberculosis therapy, CI: confidence interval, OR: odds ratio.

SDC 18. Summary of systematic reviews of studies determining the proportion of adult hospital admissions attributable to ADRs.

| Review                         | Restrictions applied at search stage                                                    |                  |                                            |                 |                                                                                                                  |                                    | No of studies identified | No of patients/ admissions                  | Heterogeneity                                                       | Subgroup analyses?                                                      | Main outcome                                                            | Selected other outcomes                                                                                                                                                                                                                                  |
|--------------------------------|-----------------------------------------------------------------------------------------|------------------|--------------------------------------------|-----------------|------------------------------------------------------------------------------------------------------------------|------------------------------------|--------------------------|---------------------------------------------|---------------------------------------------------------------------|-------------------------------------------------------------------------|-------------------------------------------------------------------------|----------------------------------------------------------------------------------------------------------------------------------------------------------------------------------------------------------------------------------------------------------|
|                                | Databases                                                                               | Publication Date | Language                                   | Settings        | ADR definition                                                                                                   | Design                             |                          |                                             |                                                                     |                                                                         |                                                                         |                                                                                                                                                                                                                                                          |
| Einarson, 1993 <sup>1</sup>    | Medline, Index Medicus, IPA                                                             | 1966 to 1989     | English only                               | No restriction  | Cluff definition <sup>2</sup> and non-compliance. Excluded overdose, intentional poisoning, abuse, intoxication. | No restriction reported.           | 37                       | 69187 admissions                            | Not measured, but discussed range of study size and study duration. | Yes, for paediatric studies; and for non-compliance studies.            | Median ADRad proportion of 37 studies is 4.9%, IQR 2.9% to 6.7%         | Proportion of patients who die subsequent to ADRad (11 studies): 5.0% of ADRad patients; 0.3% of all admissions.                                                                                                                                         |
| Muehlberger, 1997 <sup>3</sup> | Medline, EMBASE, Toxline, SoMed, Geriatrics, Deutsche Bibliographie, Chemical Abstracts | 1970 to 1996     | English or German                          | No restriction  | Authors' definition had to be largely consistent with WHO definition <sup>4</sup> .                              | No restriction.                    | 25                       | 160354 admissions / consultations/ patients | Not measured, but implied in design of the analysis.                | Yes, by setting, and by study design.                                   | Median ADRad proportion of 25 studies is 4.1%, IQR 2.5% to 5.9%         | Selective study setting, and comprehensive detection design, resulted in higher ADRad proportions. For studies of medical inpatients, with comprehensive monitoring (n=12 studies, n=20037 admissions) median ADRad proportion is 5.8%, IQR 4.2% to 6.0% |
| Lazarou, 1998 <sup>5</sup>     | Medline, EMBASE, IPA, SCI, hand search                                                  | 1966 to 1996     | English (or English translation available) | Only US studies | WHO definition <sup>4</sup> only; excluded 'possible' ADRs.                                                      | Only prospective studies included. | 21 (in ADRad analysis)   | 28017 patients (in ADRad analysis)          | Not measured, but discussed.                                        | Yes, for fatal ADRs.                                                    | Meta-analytic estimate 4.7% (95% CI 3.1% to 6.2%) admissions are ADRad. | Proportion of fatal ADRs (ADRad and ADR during inpatient stay): 0.32% of 46625 patients studied.                                                                                                                                                         |
| Wiffen, 2001 <sup>6</sup>      | Medline, EMBASE, IPA                                                                    | 1966 to 1999     | No restriction                             | No restriction  | No restriction, but excluded administration errors, non-compliance, overdose, abuse or therapeutic failure.      | No restriction.                    | 37 (in ADRad analysis)   | 133741 patients (in ADRad analysis)         | Not measured, but implied.                                          | Yes, by study design, geographical setting, clinical setting, and date. | Weighted mean ADRad proportion is 3.1% (CI not reported).               | Subgroup analyses combine ADRad and ADRs in inpatients.                                                                                                                                                                                                  |

| Review                      | Restrictions applied at search stage   |                  |                |                |                                                                                                |                                    | No of studies identified | No of patients/ admissions | Heterogeneity                                                     | Subgroup analyses?                                                                    | Main outcome                                                  | Selected other outcomes                                                                                                      |
|-----------------------------|----------------------------------------|------------------|----------------|----------------|------------------------------------------------------------------------------------------------|------------------------------------|--------------------------|----------------------------|-------------------------------------------------------------------|---------------------------------------------------------------------------------------|---------------------------------------------------------------|------------------------------------------------------------------------------------------------------------------------------|
|                             | Databases                              | Publication Date | Language       | Settings       | ADR definition                                                                                 | Design                             |                          |                            |                                                                   |                                                                                       |                                                               |                                                                                                                              |
| Beijer, 2002 <sup>7</sup>   | Medline, Cochrane Library, hand search | 1966 to 2000     | Not reported   | No restriction | WHO definition <sup>4</sup> . Excluded illicit drug use, abuse, therapeutic failure, overdose. | No restriction reported.           | 68                       | 123794 admissions          | Confirmed heterogeneity: smaller studies show higher proportions. | Yes, by age group, date of publication, geographical region, and by clinical setting. | Weighted mean ADRad proportion is 4.9% (95% CI 4.8% to 5.0%). | For studies of non-elderly (n=51 studies, n=11624 admissions): weighted mean ADRad proportion is 4.1% (95% CI 4.0% to 4.2%). |
| Kongkaew, 2008 <sup>8</sup> | CINAHL, EMBASE, Medline                | To Aug 2007      | No restriction | No restriction | WHO definition <sup>4</sup> or another ADR definition that mapped to it.                       | Only prospective studies included. | 25                       | 106586 admissions          | Confirmed heterogeneity: I <sup>2</sup> = 98.5%.                  | Yes, by age group, and by ADR detection method.                                       | Median ADRad proportion is 5.3%, IQR 2.7% to 9.0%.            | For studies of adults (n=10 studies, n=11477 patients): median ADRad proportion is 6.3%, IQR 3.9% to 9.0%.                   |

ADR: adverse drug reaction; ADRad: admissions due to an adverse drug reaction; CI: confidence interval; CINAHL: Cumulative Index to Nursing and Allied Health Literature; EMBASE: Excerpta Medica Database; IPA: International Pharmaceutical Abstracts; IQR: interquartile range; SCI: Science Citation Index; WHO: World Health Organization

1. Einarson TR. Drug-related hospital admissions. *Ann Pharmacother.* 1993;27(7-8):832–840.
2. Cluff LE, Thornton GF, Seidl LG. Studies on the Epidemiology of Adverse Drug Reactions. I. Methods of Surveillance. *JAMA.* 1964;188:976–983.
3. Muehlberger N, Schneeweiss S, Hasford J. Adverse drug reaction monitoring--cost and benefit considerations. Part I: frequency of adverse drug reactions causing hospital admissions. *Pharmacoepidemiol Drug Saf.* 1997;6 Suppl 3:S71–S77.
4. World Health Organization. *International drug monitoring: the role of national centres, report of a WHO meeting [held in Geneva from 20 to 25 September 1971]. Technical Report Series, no 498.* Geneva: World Health Organization; 1972.
5. Lazarou J, Pomeranz BH, Corey PN. Incidence of adverse drug reactions in hospitalized patients: a meta-analysis of prospective studies. *JAMA.* 1998;279(15):1200–1205.
6. Wiffen P, Gill M, Edwards J, Moore A. Adverse drug reactions in hospital patients: A systematic review of the prospective and retrospective studies. *Bandolier Extra.* 2002;(June):1–15.
7. Beijer HJM, de Blaey CJ. Hospitalisations caused by adverse drug reactions (ADR): a meta-analysis of observational studies. *Pharm World Sci.* 2002;24(2):46–54.
8. Kongkaew C, Noyce PR, Ashcroft DM. Hospital admissions associated with adverse drug reactions: a systematic review of prospective observational studies. *Ann Pharmacother.* 2008;42(7):1017–1025.
